# Supplementary material for: Image Classification of Amazon Parrots by Deep Learning: A Potentially Useful Tool for Wildlife Conservation
Source: MDPI journal article supplement (doi:10.3390/biology11091303), 2022-09-01
Supplement: s1 [file s1]

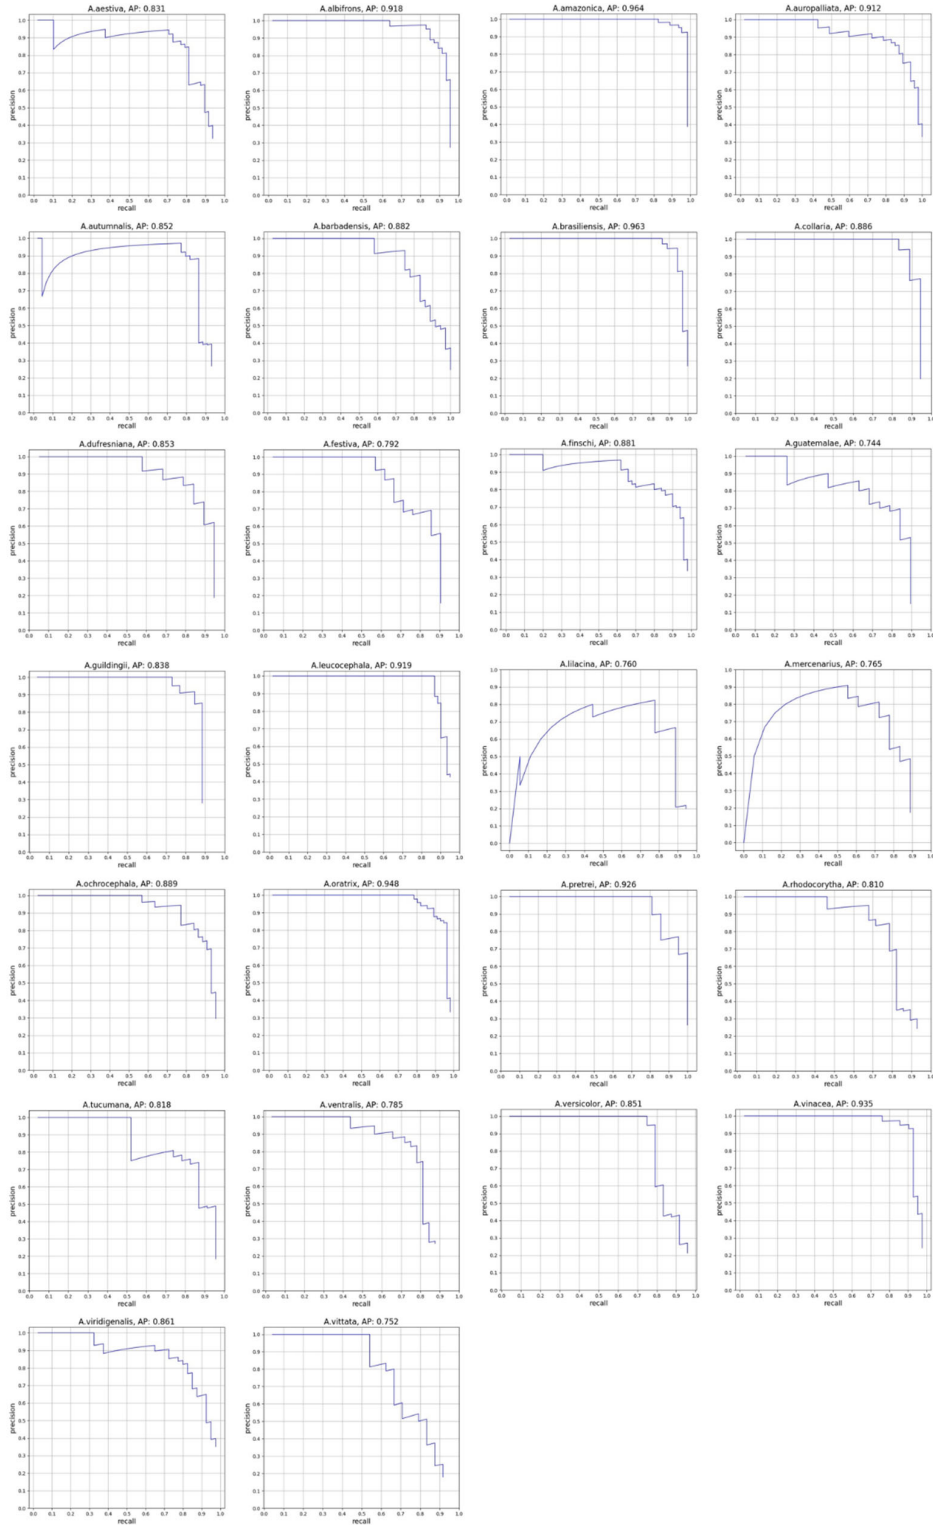

**Figure S1.** The precision–recall curves of the 26 Amazon parrot species for the VGGNet16 model.

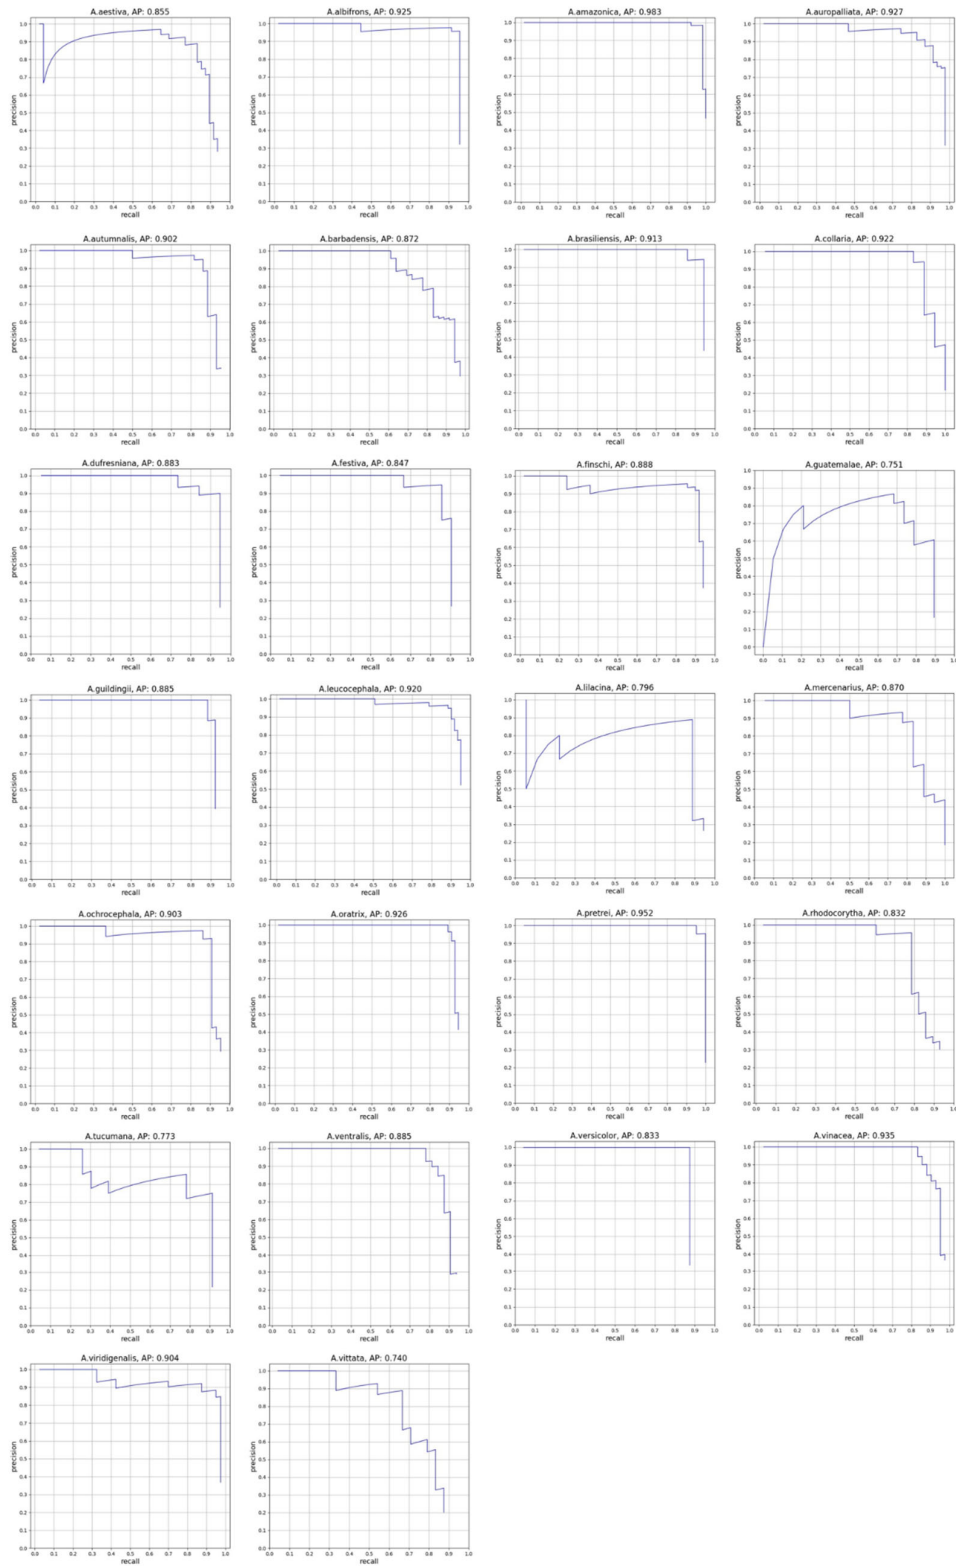

**Figure S2.** The precision–recall curves of the 26 Amazon parrot species for the ResNet18 model.

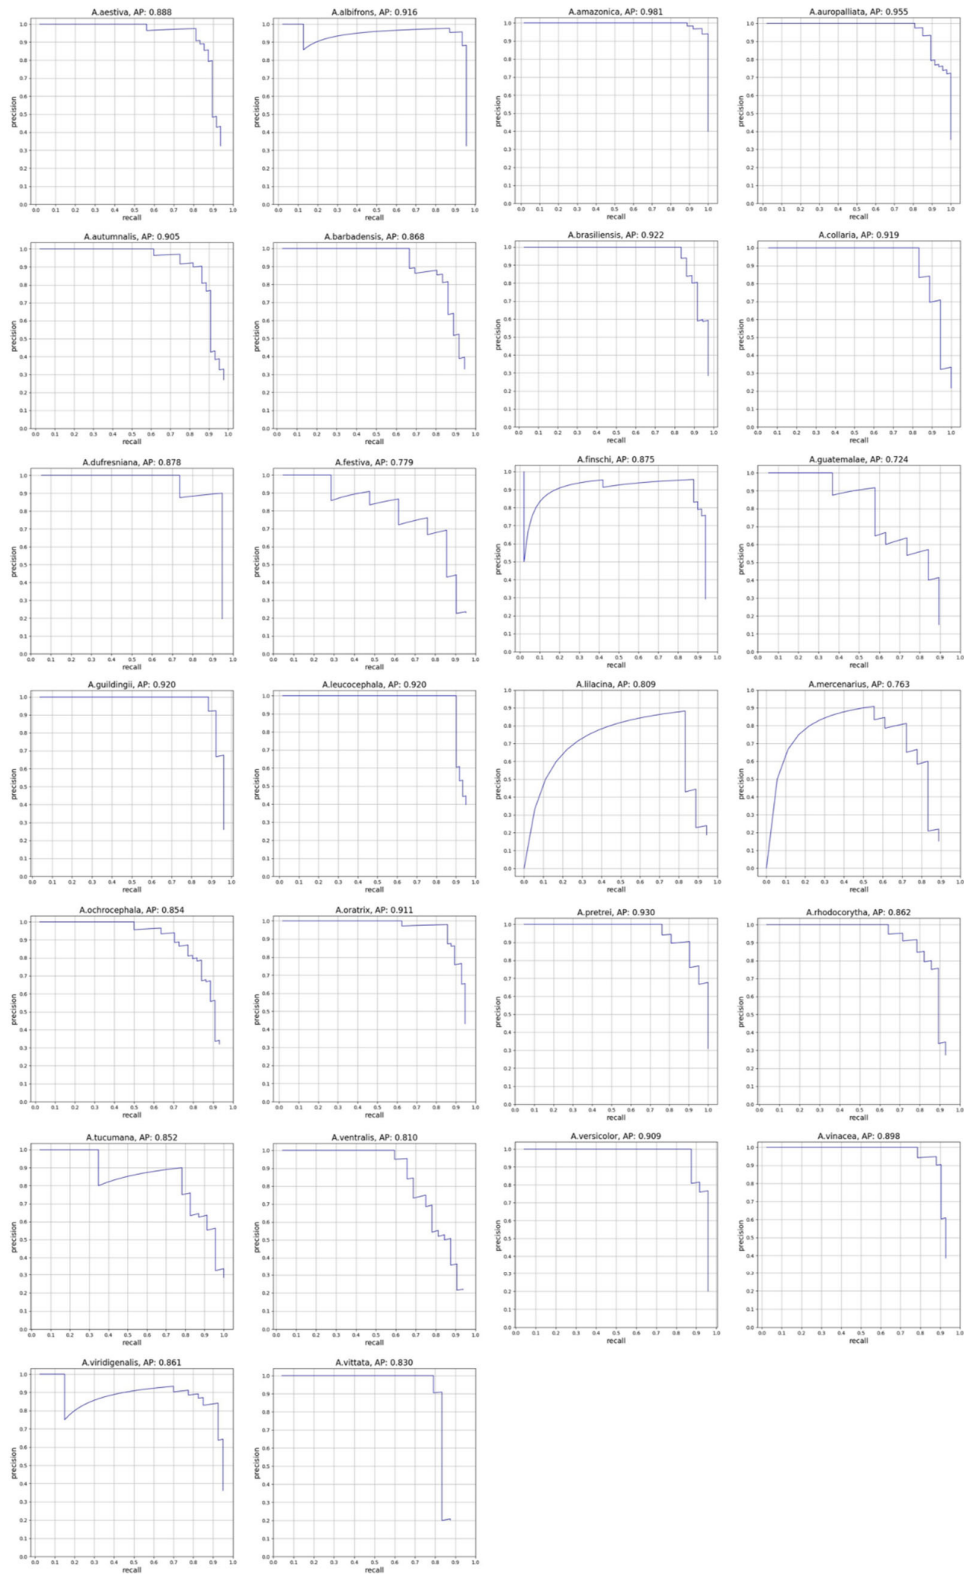

**Figure S3.** The precision–recall curves of the 26 Amazon parrot species for the ResNet34 model.

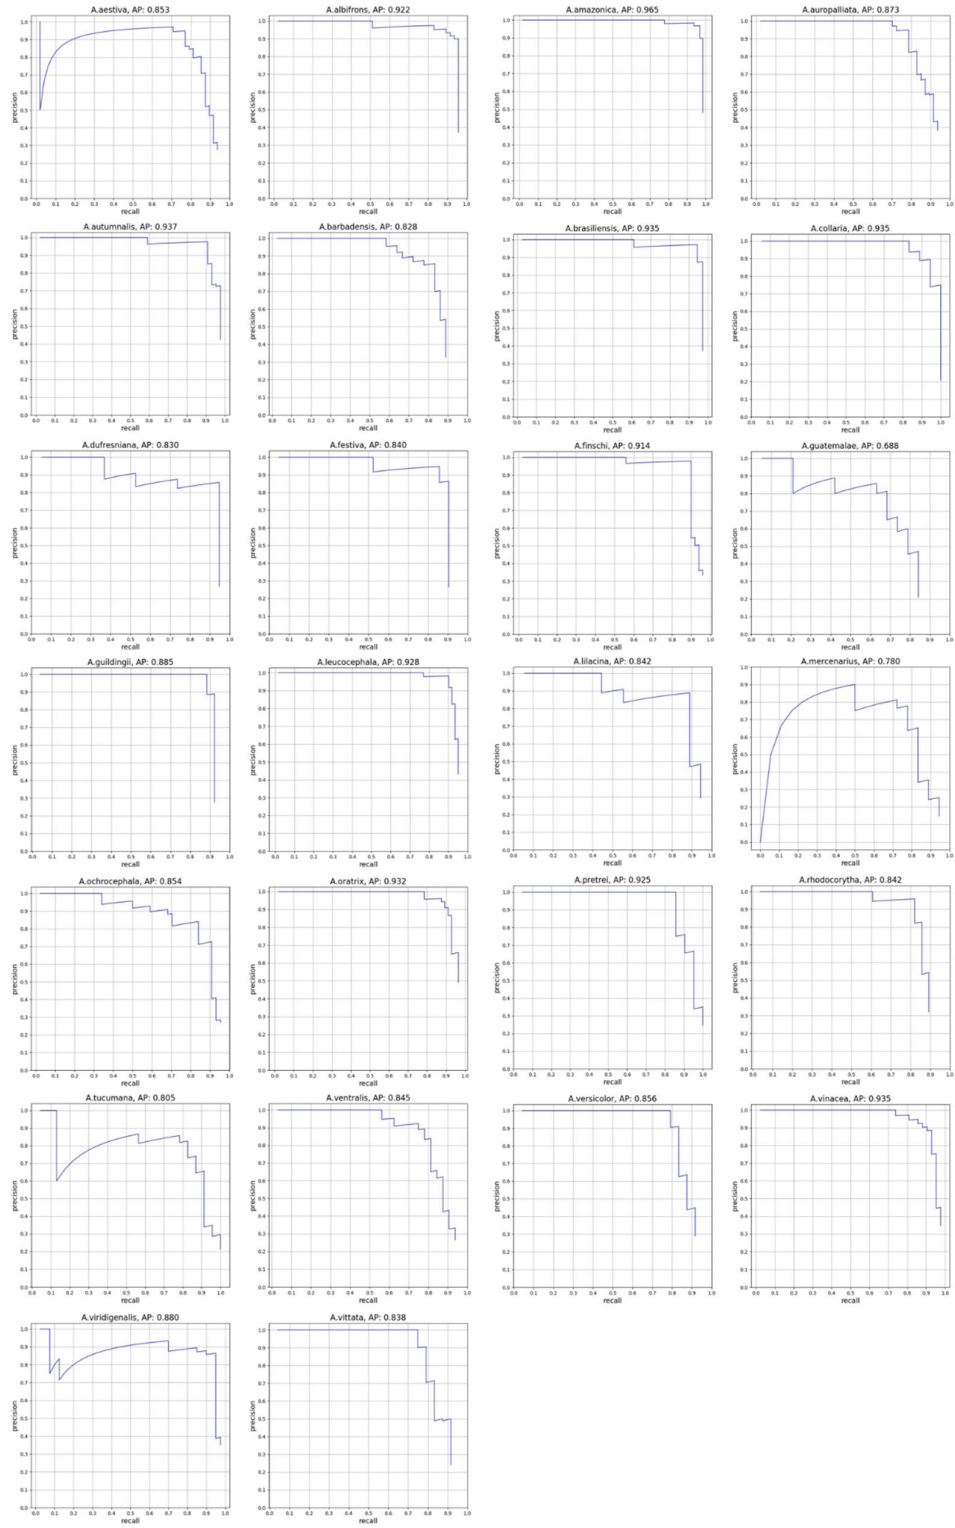

**Figure S4.** The precision–recall curves of the 26 Amazon parrot species for the ResNet50 model.

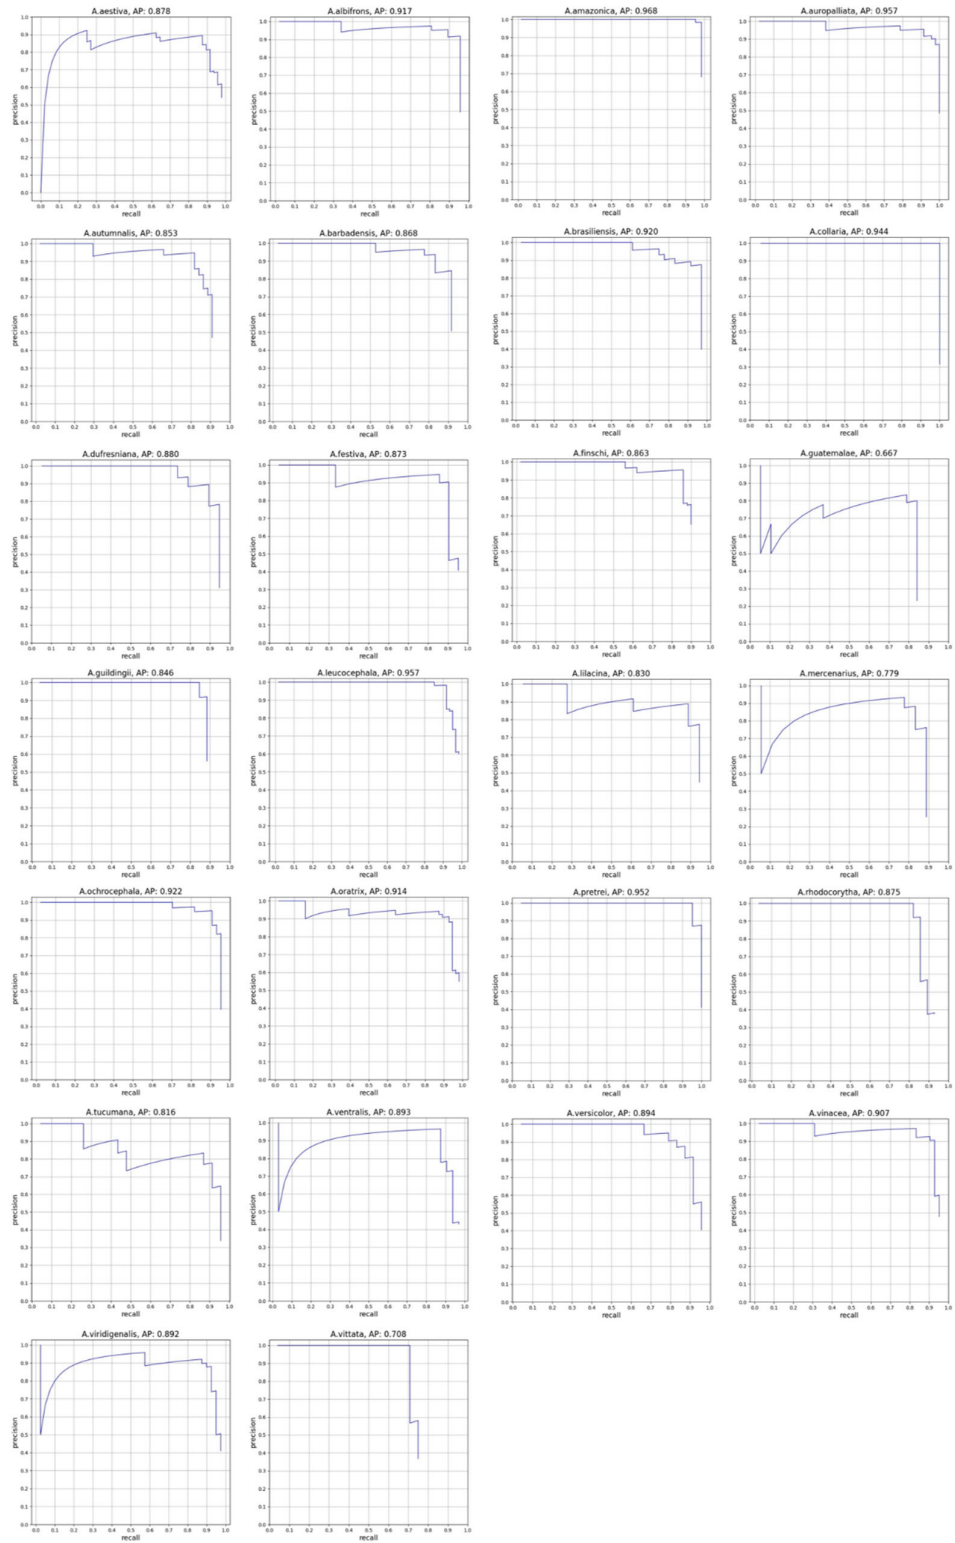

**Figure S5.** The precision–recall curves of the 26 Amazon parrot species for the DenseNet18 model.

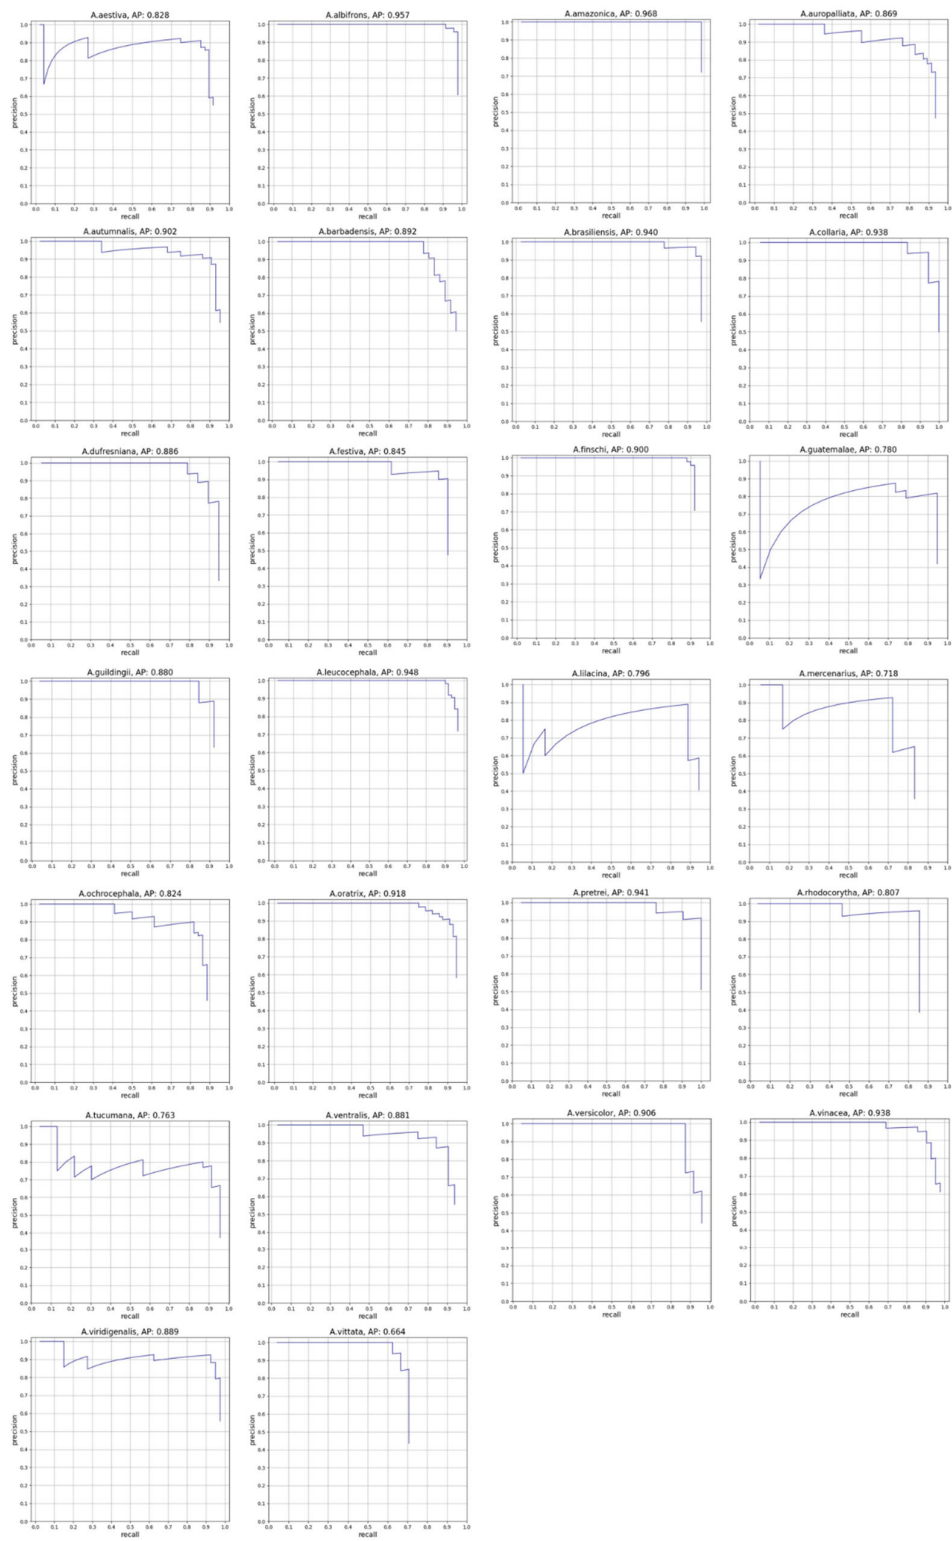

**Figure S6.** The precision–recall curves of the 26 Amazon parrot species for the DenseNet30 model.

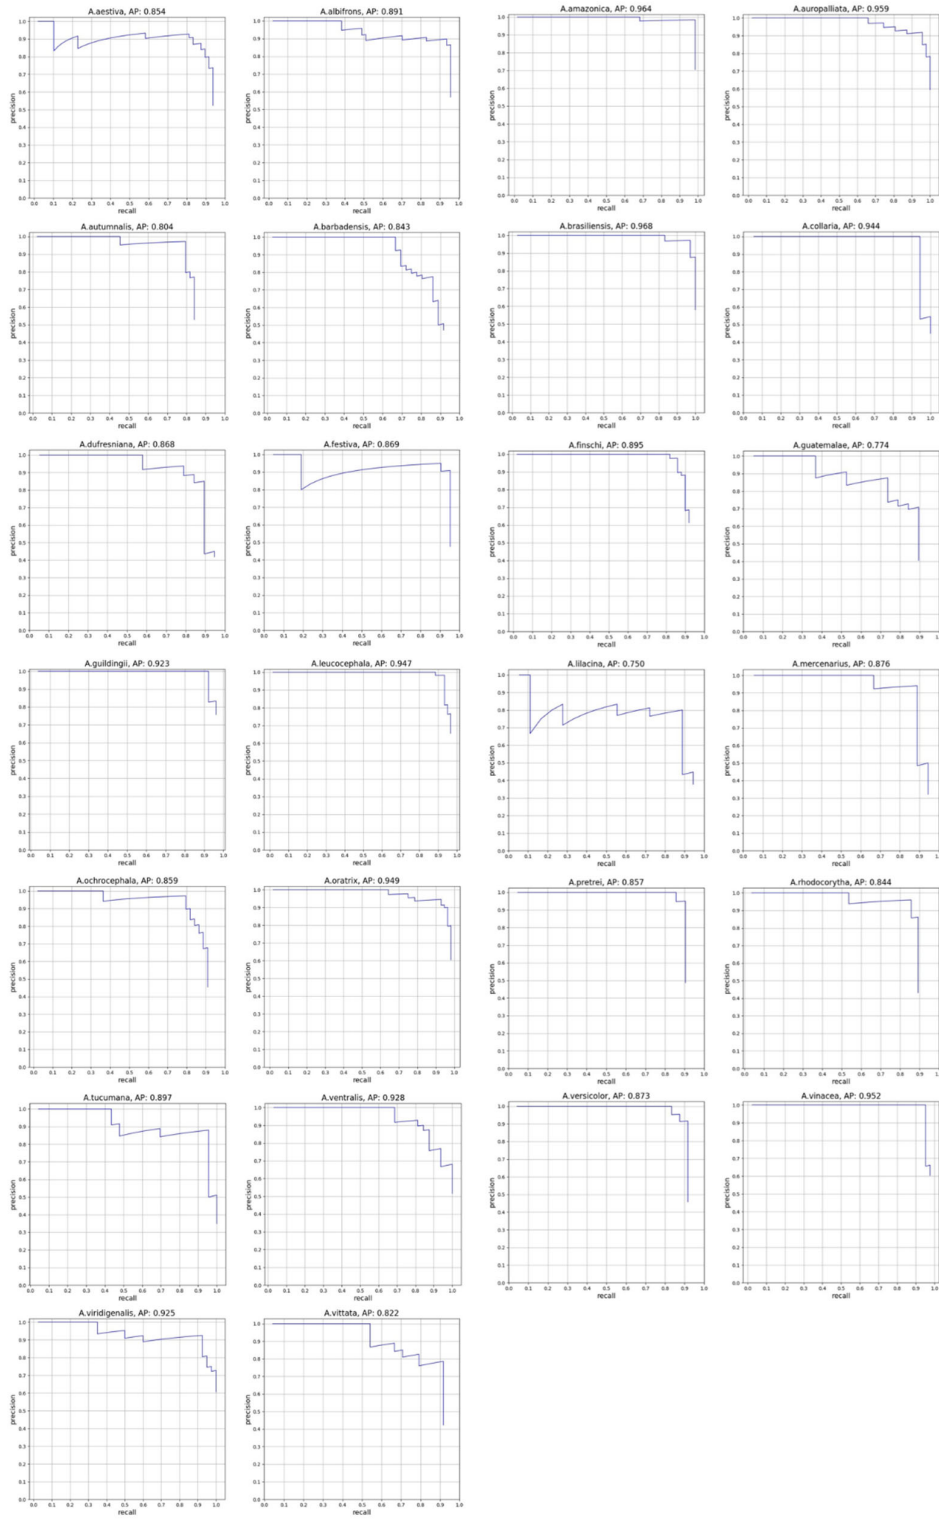

**Figure S7.** The precision–recall curves of the 26 Amazon parrot species for the DenseNet50 model.



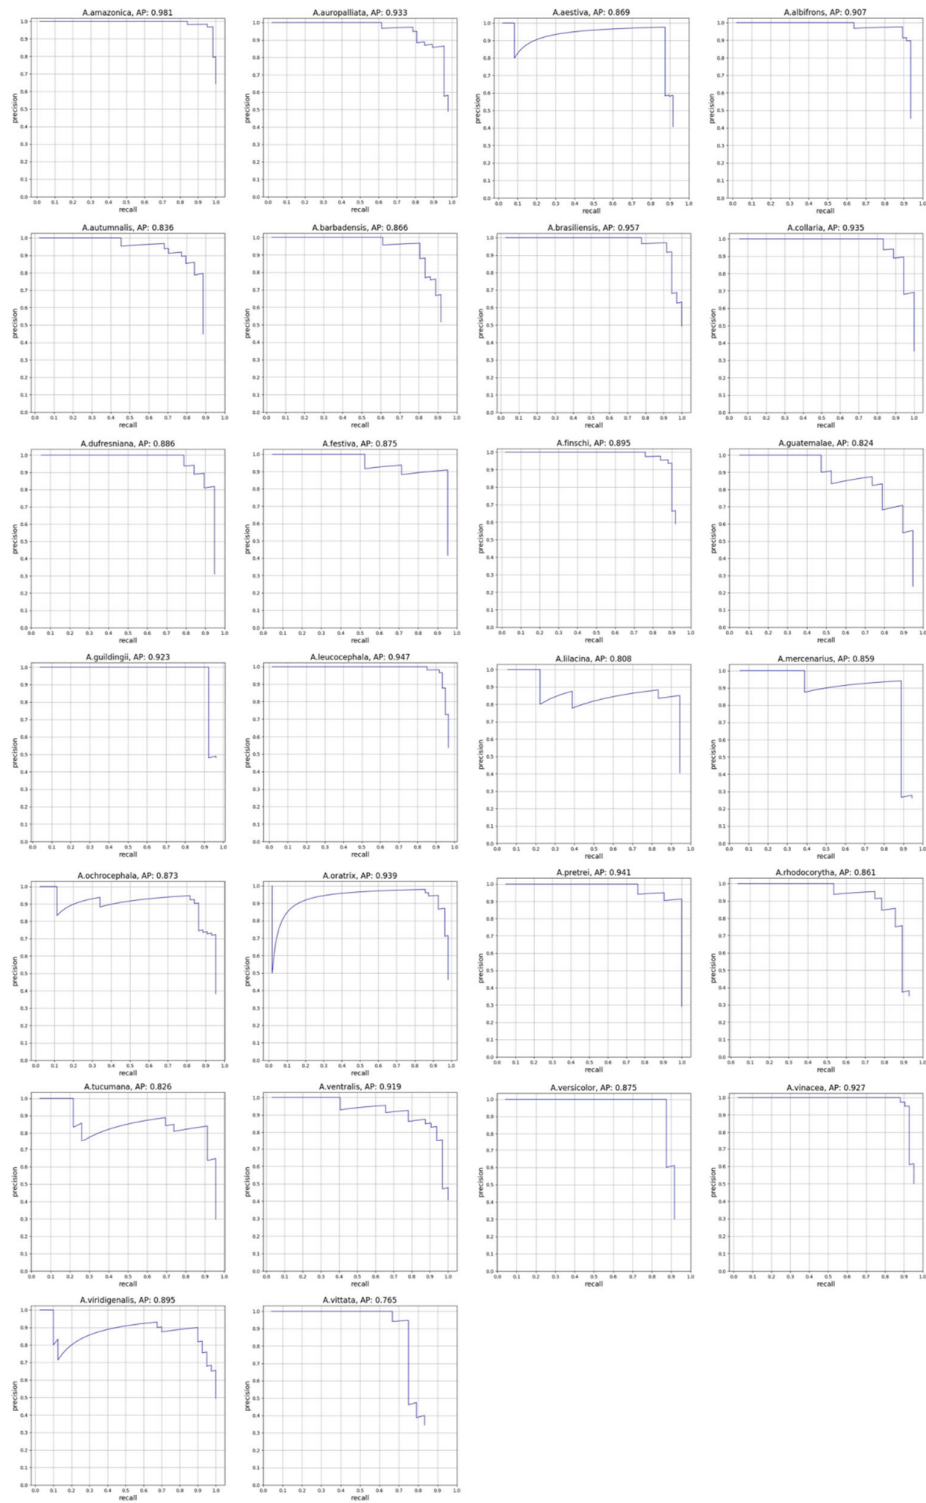

**Figure S8.** The precision–recall curves of the 26 Amazon parrot species for the DenseNet121 model.



**Table S1.** The augmentation rates and the number of training set after data augmentation of the 26 Amazon parrot species.

| No. | Species                      | Augmentation<br>range | Training set after data<br>augmentation |
|-----|------------------------------|-----------------------|-----------------------------------------|
| 1   | <i>Amazona aestiva</i>       | 11                    | 10,074                                  |
| 2   | <i>Amazona albifrons</i>     | 12                    | 10,850                                  |
| 3   | <i>Amazona amazonica</i>     | 9                     | 10,982                                  |
| 4   | <i>Amazona auropalliata</i>  | 12                    | 10,750                                  |
| 5   | <i>Amazona autumnalis</i>    | 12                    | 10,100                                  |
| 6   | <i>Amazona barbadensis</i>   | 15                    | 10,168                                  |
| 7   | <i>Amazona brasiliensis</i>  | 15                    | 10,230                                  |
| 8   | <i>Amazona collaria</i>      | 32                    | 10,140                                  |
| 9   | <i>Amazona dufresniana</i>   | 30                    | 10,126                                  |
| 10  | <i>Amazona festiva</i>       | 26                    | 10,070                                  |
| 11  | <i>Amazona finschi</i>       | 11                    | 10,488                                  |
| 12  | <i>Amazona guatemalae</i>    | 30                    | 10,248                                  |
| 13  | <i>Amazona guildingii</i>    | 22                    | 10,260                                  |
| 14  | <i>Amazona leucocephala</i>  | 9                     | 10,640                                  |
| 15  | <i>Amazona lilacina</i>      | 32                    | 10,140                                  |
| 16  | <i>Amazona mercenarius</i>   | 32                    | 10,270                                  |
| 17  | <i>Amazona ochrocephala</i>  | 13                    | 10,692                                  |
| 18  | <i>Amazona oratrix</i>       | 10                    | 10,710                                  |
| 19  | <i>Amazona pretrei</i>       | 27                    | 10,010                                  |
| 20  | <i>Amazona rhodocorytha</i>  | 20                    | 10,332                                  |
| 21  | <i>Amazona tucumana</i>      | 24                    | 10,290                                  |
| 22  | <i>Amazona ventralis</i>     | 17                    | 10,150                                  |
| 23  | <i>Amazona versicolor</i>    | 23                    | 10,058                                  |
| 24  | <i>Amazona vinacea</i>       | 13                    | 10,314                                  |
| 25  | <i>Amazona viridigenalis</i> | 14                    | 10,440                                  |
| 26  | <i>Amazona vittata</i>       | 23                    | 10,152                                  |

**Table S2.** Structure of VGGNet based on SSD architecture. Each "Conv" layer in the table corresponds to the composite function sequence Conv-ReLU.

| Layers                            | Output Size<br>(Width×Height×Channel) | Specification                      |
|-----------------------------------|---------------------------------------|------------------------------------|
| Conv × 2                          | 300×300×64                            | 3×3 Conv, stride 1, name : conv1_1 |
|                                   | 300×300×64                            | 3×3 Conv, stride 1, name : conv1_2 |
| Pooling                           | 150×150×64                            | 2×2 Max Pool, stride 2             |
| Conv × 2                          | 150×150×128                           | 3×3 Conv, stride 1, name : conv2_1 |
|                                   | 150×150×128                           | 3×3 Conv, stride 1, name : conv2_2 |
| Pooling                           | 75×75×128                             | 2×2 Max Pool, stride 2             |
| Conv × 3                          | 75×75×256                             | 3×3 Conv, stride 1, name : conv3_1 |
|                                   | 75×75×256                             | 3×3 Conv, stride 1, name : conv3_2 |
|                                   | 75×75×256                             | 3×3 Conv, stride 1, name : conv3_3 |
| Pooling                           | 38×38×256                             | 2×2 Max Pool, stride 2             |
| Conv × 3                          | 38×38×512                             | 3×3 Conv, stride 1, name : conv4_1 |
|                                   | 38×38×512                             | 3×3 Conv, stride 1, name : conv4_2 |
|                                   | 38×38×512                             | 3×3 Conv, stride 1, name : conv4_3 |
| Pooling                           | 19×19×512                             | 2×2 Max Pool, stride 2             |
| Conv × 3                          | 19×19×512                             | 3×3 Conv, stride 1, name : conv5_1 |
|                                   | 19×19×512                             | 3×3 Conv, stride 1, name : conv5_2 |
|                                   | 19×19×512                             | 3×3 Conv, stride 1, name : conv5_3 |
| Pooling                           | 19×19×512                             | 3×3 Max Pool, stride 1             |
| Weight parameters (unit: million) |                                       | 25                                 |

**Table S3.** Structure of ResNet based on SSD architecture. Each "Conv" layer in the table corresponds to the composite function sequence BN-ReLU-Conv.

| Layers                            | Output Size<br>(Width×Height×Channel) | 18-layer                                                                                    | 34-layer                                                                                    | 50-layer                                                                                                               |
|-----------------------------------|---------------------------------------|---------------------------------------------------------------------------------------------|---------------------------------------------------------------------------------------------|------------------------------------------------------------------------------------------------------------------------|
| Conv                              | 75×75×64                              | 7×7 Conv, stride 2<br>3×3 Max Pool, stride 2                                                |                                                                                             |                                                                                                                        |
| Block (1)                         | 75×75×64                              | $\begin{bmatrix} 3 \times 3 \text{ Conv} \\ 3 \times 3 \text{ Conv} \end{bmatrix} \times 2$ | $\begin{bmatrix} 3 \times 3 \text{ Conv} \\ 3 \times 3 \text{ Conv} \end{bmatrix} \times 3$ | $\begin{bmatrix} 1 \times 1 \text{ Conv} \\ 3 \times 3 \text{ Conv} \\ 1 \times 1 \text{ Conv} \end{bmatrix} \times 3$ |
| Block (2)                         | 38×38×128                             | $\begin{bmatrix} 3 \times 3 \text{ Conv} \\ 3 \times 3 \text{ Conv} \end{bmatrix} \times 2$ | $\begin{bmatrix} 3 \times 3 \text{ Conv} \\ 3 \times 3 \text{ Conv} \end{bmatrix} \times 4$ | $\begin{bmatrix} 1 \times 1 \text{ Conv} \\ 3 \times 3 \text{ Conv} \\ 1 \times 1 \text{ Conv} \end{bmatrix} \times 4$ |
| Block (3)                         | 19×19×256                             | $\begin{bmatrix} 3 \times 3 \text{ Conv} \\ 3 \times 3 \text{ Conv} \end{bmatrix} \times 2$ | $\begin{bmatrix} 3 \times 3 \text{ Conv} \\ 3 \times 3 \text{ Conv} \end{bmatrix} \times 6$ | $\begin{bmatrix} 1 \times 1 \text{ Conv} \\ 3 \times 3 \text{ Conv} \\ 1 \times 1 \text{ Conv} \end{bmatrix} \times 6$ |
| Weight parameters (unit: million) |                                       | 10                                                                                          | 16                                                                                          | 23                                                                                                                     |

**Table S4.** Structure of DenseNet based on SSD architecture. Growth rate  $K = 32$  was used for each dense block. Each "Conv" layer in the table corresponds to the composite function sequence BN-ReLU-Conv.

| Layers                            | Output Size<br>(Width×Height×Channel) | 18-layer                                                                                  | 30-layer                                                                                  | 50-layer                                                                                   | 121-layer                                                                                  |
|-----------------------------------|---------------------------------------|-------------------------------------------------------------------------------------------|-------------------------------------------------------------------------------------------|--------------------------------------------------------------------------------------------|--------------------------------------------------------------------------------------------|
| Conv                              | 75×75×64                              | 7×7 Conv, stride 2<br>3×3 max pooling, stride 2                                           |                                                                                           |                                                                                            |                                                                                            |
| Dense block (1)                   | 75×75×256                             | $\begin{bmatrix} 1 \times 1 \text{ Conv} \\ 3 \times 3 \text{ Conv} \end{bmatrix}$<br>× 6 | $\begin{bmatrix} 1 \times 1 \text{ Conv} \\ 3 \times 3 \text{ Conv} \end{bmatrix}$<br>× 6 | $\begin{bmatrix} 1 \times 1 \text{ Conv} \\ 3 \times 3 \text{ Conv} \end{bmatrix}$<br>× 8  | $\begin{bmatrix} 1 \times 1 \text{ Conv} \\ 3 \times 3 \text{ Conv} \end{bmatrix}$<br>× 6  |
| Transition (1)                    | 75×75×256<br>38×38×256                | 1×1 Conv<br>2×2 average pooling, stride 2                                                 |                                                                                           |                                                                                            |                                                                                            |
| Dense block (2)                   | 38×38×384                             | $\begin{bmatrix} 1 \times 1 \text{ Conv} \\ 3 \times 3 \text{ Conv} \end{bmatrix}$<br>× 4 | $\begin{bmatrix} 1 \times 1 \text{ Conv} \\ 3 \times 3 \text{ Conv} \end{bmatrix}$<br>× 8 | $\begin{bmatrix} 1 \times 1 \text{ Conv} \\ 3 \times 3 \text{ Conv} \end{bmatrix}$<br>× 10 | $\begin{bmatrix} 1 \times 1 \text{ Conv} \\ 3 \times 3 \text{ Conv} \end{bmatrix}$<br>× 12 |
| Transition (2)                    | 38×38×384<br>19×19×384                | 1×1 Conv<br>2×2 average pooling, stride 2                                                 |                                                                                           |                                                                                            |                                                                                            |
| Dense block (3)                   | 19×19×512                             | $\begin{bmatrix} 1 \times 1 \text{ Conv} \\ 3 \times 3 \text{ Conv} \end{bmatrix}$<br>× 4 | $\begin{bmatrix} 1 \times 1 \text{ Conv} \\ 3 \times 3 \text{ Conv} \end{bmatrix}$<br>× 8 | $\begin{bmatrix} 1 \times 1 \text{ Conv} \\ 3 \times 3 \text{ Conv} \end{bmatrix}$<br>× 13 | $\begin{bmatrix} 1 \times 1 \text{ Conv} \\ 3 \times 3 \text{ Conv} \end{bmatrix}$<br>× 24 |
| Transition (3) without pooling    | 19×19×512                             | 1×1 Conv                                                                                  |                                                                                           |                                                                                            |                                                                                            |
| Dense block (4)                   | 19×19×640                             | $\begin{bmatrix} 1 \times 1 \text{ Conv} \\ 3 \times 3 \text{ Conv} \end{bmatrix}$<br>× 4 | $\begin{bmatrix} 1 \times 1 \text{ Conv} \\ 3 \times 3 \text{ Conv} \end{bmatrix}$<br>× 8 | $\begin{bmatrix} 1 \times 1 \text{ Conv} \\ 3 \times 3 \text{ Conv} \end{bmatrix}$<br>× 19 | $\begin{bmatrix} 1 \times 1 \text{ Conv} \\ 3 \times 3 \text{ Conv} \end{bmatrix}$<br>× 16 |
| Transition (4) without pooling    | 19×19×640                             | 1×1 Conv                                                                                  |                                                                                           |                                                                                            |                                                                                            |
| Weight parameters (unit: million) |                                       | 13                                                                                        | 20                                                                                        | 32                                                                                         | 39                                                                                         |

**Table S5.** The values of average precision (AP) of the assessed models for the 26 Amazon parrot species.

| No. | Species                      | VGGNet16<br>(%) | ResNet18<br>(%) | ResNet34<br>(%) | ResNet50<br>(%) | DenseNet18<br>(%) | DenseNet30<br>(%) | DenseNet50<br>(%) | DenseNet121<br>(%) |
|-----|------------------------------|-----------------|-----------------|-----------------|-----------------|-------------------|-------------------|-------------------|--------------------|
| 1   | <i>Amazona aestiva</i>       | 83.1            | 85.5            | 88.8            | 85.3            | 87.8              | 82.8              | 85.4              | 86.9               |
| 2   | <i>Amazona albifrons</i>     | 91.8            | 92.5            | 91.6            | 92.2            | 91.7              | 95.7              | 89.1              | 90.7               |
| 3   | <i>Amazona amazonica</i>     | 96.4            | 98.3            | 98.1            | 96.5            | 96.8              | 96.8              | 96.4              | 98.1               |
| 4   | <i>Amazona auropalliata</i>  | 91.2            | 92.7            | 95.5            | 87.3            | 95.7              | 86.9              | 95.9              | 93.3               |
| 5   | <i>Amazona autumnalis</i>    | 85.2            | 90.2            | 90.5            | 93.7            | 85.3              | 90.2              | 80.4              | 83.6               |
| 6   | <i>Amazona barbadensis</i>   | 88.2            | 87.2            | 86.8            | 82.8            | 86.8              | 89.2              | 84.3              | 86.6               |
| 7   | <i>Amazona brasiliensis</i>  | 96.3            | 91.3            | 92.2            | 93.5            | 92.0              | 94.0              | 96.8              | 95.7               |
| 8   | <i>Amazona collaria</i>      | 88.6            | 92.2            | 91.9            | 93.5            | 94.4              | 93.8              | 94.4              | 93.5               |
| 9   | <i>Amazona dufresniana</i>   | 85.3            | 88.3            | 87.8            | 83.0            | 88.0              | 88.6              | 86.8              | 88.6               |
| 10  | <i>Amazona festiva</i>       | 79.2            | 84.7            | 77.9            | 84.0            | 87.3              | 84.5              | 86.9              | 87.5               |
| 11  | <i>Amazona finschi</i>       | 88.1            | 88.8            | 87.5            | 91.4            | 86.3              | 90.0              | 89.5              | 89.5               |
| 12  | <i>Amazona guatemalae</i>    | 74.4            | 75.1            | 72.4            | 68.8            | 66.7              | 78.0              | 77.4              | 82.4               |
| 13  | <i>Amazona guildingii</i>    | 83.8            | 88.5            | 92.0            | 88.5            | 84.6              | 88.0              | 92.3              | 92.3               |
| 14  | <i>Amazona leucocephala</i>  | 91.9            | 92.0            | 92.0            | 92.8            | 95.7              | 94.8              | 94.7              | 94.7               |
| 15  | <i>Amazona lilacina</i>      | 76.0            | 79.6            | 80.9            | 84.2            | 83.0              | 79.6              | 75.0              | 80.8               |
| 16  | <i>Amazona mercenarius</i>   | 76.5            | 87.0            | 76.3            | 78.0            | 77.9              | 71.8              | 87.6              | 85.9               |
| 17  | <i>Amazona ochrocephala</i>  | 88.9            | 90.3            | 85.4            | 85.4            | 92.2              | 82.4              | 85.9              | 87.3               |
| 18  | <i>Amazona oratrix</i>       | 94.8            | 92.6            | 91.1            | 93.2            | 91.4              | 91.8              | 94.9              | 93.9               |
| 19  | <i>Amazona pretrei</i>       | 92.6            | 95.2            | 93.0            | 92.5            | 95.2              | 94.1              | 85.7              | 94.1               |
| 20  | <i>Amazona rhodocorytha</i>  | 81.0            | 83.2            | 86.2            | 84.2            | 87.5              | 80.7              | 84.4              | 86.1               |
| 21  | <i>Amazona tucumana</i>      | 81.8            | 77.3            | 85.2            | 80.5            | 81.6              | 76.3              | 89.7              | 82.6               |
| 22  | <i>Amazona ventralis</i>     | 78.5            | 88.5            | 81.0            | 84.5            | 89.3              | 88.1              | 92.8              | 91.9               |
| 23  | <i>Amazona versicolor</i>    | 85.1            | 83.3            | 90.9            | 85.6            | 89.4              | 90.6              | 87.3              | 87.5               |
| 24  | <i>Amazona vinacea</i>       | 93.5            | 93.5            | 89.8            | 93.5            | 90.7              | 93.8              | 95.2              | 92.7               |
| 25  | <i>Amazona viridigenalis</i> | 86.1            | 90.4            | 86.1            | 88.0            | 89.2              | 88.9              | 92.5              | 89.5               |
| 26  | <i>Amazona vittata</i>       | 75.2            | 74.0            | 83.0            | 83.8            | 70.8              | 66.4              | 82.2              | 76.5               |
| mAP |                              | 81.6            | 87.8            | 87.5            | 87.2            | 87.2              | 87.6              | 86.8              | 88.6               |

**Table S6.** Confusion matrix of the VGGNet16 model for the classification of the 26 Amazon parrot species.

|              |    | Predicted Results |      |      |      |      |      |      |      |      |      |      |      |      |      |      |      |      |      |      |      |      |      |      |      |      |      |
|--------------|----|-------------------|------|------|------|------|------|------|------|------|------|------|------|------|------|------|------|------|------|------|------|------|------|------|------|------|------|
| True Results |    | 1                 | 2    | 3    | 4    | 5    | 6    | 7    | 8    | 9    | 10   | 11   | 12   | 13   | 14   | 15   | 16   | 17   | 18   | 19   | 20   | 21   | 22   | 23   | 24   | 25   | 26   |
|              | 1  | 81.3              | 0.0  | 6.3  | 0.0  | 0.0  | 6.3  | 0.0  | 0.0  | 0.0  | 0.0  | 0.0  | 0.0  | 0.0  | 2.1  | 0.0  | 0.0  | 4.2  | 0.0  | 0.0  | 0.0  | 0.0  | 0.0  | 0.0  | 0.0  | 0.0  | 0.0  |
|              | 2  | 0.0               | 97.9 | 0.0  | 0.0  | 0.0  | 0.0  | 0.0  | 0.0  | 0.0  | 0.0  | 0.0  | 0.0  | 0.0  | 0.0  | 0.0  | 0.0  | 0.0  | 0.0  | 2.1  | 0.0  | 0.0  | 0.0  | 0.0  | 0.0  | 0.0  | 0.0  |
|              | 3  | 1.6               | 0.0  | 95.2 | 0.0  | 0.0  | 1.6  | 0.0  | 0.0  | 0.0  | 1.6  | 0.0  | 0.0  | 0.0  | 0.0  | 0.0  | 0.0  | 0.0  | 0.0  | 0.0  | 0.0  | 0.0  | 0.0  | 0.0  | 0.0  | 0.0  | 0.0  |
|              | 4  | 0.0               | 0.0  | 0.0  | 80.9 | 0.0  | 2.1  | 0.0  | 0.0  | 0.0  | 0.0  | 0.0  | 0.0  | 0.0  | 0.0  | 0.0  | 0.0  | 17.0 | 0.0  | 0.0  | 0.0  | 0.0  | 0.0  | 0.0  | 0.0  | 0.0  | 0.0  |
|              | 5  | 0.0               | 0.0  | 0.0  | 0.0  | 84.1 | 0.0  | 0.0  | 0.0  | 0.0  | 2.3  | 2.3  | 0.0  | 0.0  | 0.0  | 0.0  | 0.0  | 0.0  | 0.0  | 4.5  | 0.0  | 2.3  | 0.0  | 0.0  | 0.0  | 2.3  | 2.3  |
|              | 6  | 8.3               | 0.0  | 0.0  | 0.0  | 0.0  | 83.3 | 0.0  | 0.0  | 0.0  | 0.0  | 0.0  | 0.0  | 0.0  | 0.0  | 0.0  | 0.0  | 2.8  | 5.6  | 0.0  | 0.0  | 0.0  | 0.0  | 0.0  | 0.0  | 0.0  | 0.0  |
|              | 7  | 0.0               | 0.0  | 0.0  | 0.0  | 0.0  | 0.0  | 91.7 | 0.0  | 0.0  | 0.0  | 0.0  | 0.0  | 0.0  | 0.0  | 0.0  | 0.0  | 0.0  | 0.0  | 0.0  | 2.8  | 2.8  | 0.0  | 0.0  | 0.0  | 0.0  | 2.8  |
|              | 8  | 0.0               | 0.0  | 0.0  | 0.0  | 0.0  | 11.1 | 0.0  | 83.3 | 0.0  | 0.0  | 0.0  | 0.0  | 0.0  | 0.0  | 0.0  | 0.0  | 0.0  | 0.0  | 0.0  | 0.0  | 0.0  | 5.6  | 0.0  | 0.0  | 0.0  | 0.0  |
|              | 9  | 0.0               | 0.0  | 0.0  | 0.0  | 0.0  | 0.0  | 0.0  | 0.0  | 89.5 | 0.0  | 0.0  | 0.0  | 0.0  | 0.0  | 0.0  | 0.0  | 5.3  | 5.3  | 0.0  | 0.0  | 0.0  | 0.0  | 0.0  | 0.0  | 0.0  | 0.0  |
|              | 10 | 0.0               | 0.0  | 0.0  | 0.0  | 0.0  | 0.0  | 0.0  | 0.0  | 0.0  | 90.5 | 4.8  | 0.0  | 0.0  | 0.0  | 0.0  | 0.0  | 0.0  | 0.0  | 0.0  | 0.0  | 0.0  | 0.0  | 0.0  | 0.0  | 0.0  | 4.8  |
|              | 11 | 0.0               | 0.0  | 0.0  | 0.0  | 2.0  | 0.0  | 0.0  | 0.0  | 0.0  | 2.0  | 84.0 | 0.0  | 0.0  | 0.0  | 4.0  | 0.0  | 0.0  | 0.0  | 0.0  | 2.0  | 0.0  | 0.0  | 0.0  | 2.0  | 4.0  | 0.0  |
|              | 12 | 0.0               | 0.0  | 0.0  | 0.0  | 0.0  | 0.0  | 0.0  | 0.0  | 0.0  | 0.0  | 0.0  | 89.5 | 0.0  | 0.0  | 0.0  | 5.3  | 5.3  | 0.0  | 0.0  | 0.0  | 0.0  | 0.0  | 0.0  | 0.0  | 0.0  | 0.0  |
|              | 13 | 3.8               | 0.0  | 3.8  | 0.0  | 0.0  | 0.0  | 0.0  | 0.0  | 0.0  | 0.0  | 0.0  | 0.0  | 84.6 | 3.8  | 0.0  | 0.0  | 0.0  | 0.0  | 0.0  | 0.0  | 0.0  | 0.0  | 0.0  | 3.8  | 0.0  | 0.0  |
|              | 14 | 0.0               | 1.6  | 0.0  | 0.0  | 0.0  | 0.0  | 3.3  | 0.0  | 0.0  | 0.0  | 3.3  | 0.0  | 1.6  | 88.5 | 0.0  | 0.0  | 0.0  | 0.0  | 0.0  | 0.0  | 0.0  | 0.0  | 1.6  | 0.0  | 0.0  | 0.0  |
|              | 15 | 0.0               | 0.0  | 0.0  | 0.0  | 5.6  | 0.0  | 0.0  | 0.0  | 0.0  | 5.6  | 5.6  | 0.0  | 0.0  | 0.0  | 77.8 | 0.0  | 0.0  | 0.0  | 0.0  | 5.6  | 0.0  | 0.0  | 0.0  | 0.0  | 0.0  | 0.0  |
|              | 16 | 0.0               | 0.0  | 0.0  | 5.6  | 0.0  | 0.0  | 0.0  | 0.0  | 0.0  | 0.0  | 0.0  | 22.2 | 0.0  | 0.0  | 0.0  | 66.7 | 0.0  | 0.0  | 0.0  | 0.0  | 0.0  | 5.6  | 0.0  | 0.0  | 0.0  | 0.0  |
|              | 17 | 0.0               | 0.0  | 2.3  | 2.3  | 0.0  | 0.0  | 0.0  | 0.0  | 2.3  | 2.3  | 0.0  | 2.3  | 0.0  | 0.0  | 0.0  | 0.0  | 86.4 | 2.3  | 0.0  | 0.0  | 0.0  | 0.0  | 0.0  | 0.0  | 0.0  | 0.0  |
|              | 18 | 0.0               | 1.8  | 0.0  | 3.6  | 0.0  | 3.6  | 0.0  | 0.0  | 0.0  | 0.0  | 0.0  | 0.0  | 0.0  | 0.0  | 0.0  | 0.0  | 1.8  | 89.3 | 0.0  | 0.0  | 0.0  | 0.0  | 0.0  | 0.0  | 0.0  | 0.0  |
|              | 19 | 0.0               | 9.5  | 0.0  | 0.0  | 0.0  | 0.0  | 0.0  | 0.0  | 0.0  | 0.0  | 0.0  | 0.0  | 0.0  | 0.0  | 0.0  | 0.0  | 0.0  | 0.0  | 90.5 | 0.0  | 0.0  | 0.0  | 0.0  | 0.0  | 0.0  | 0.0  |
|              | 20 | 0.0               | 0.0  | 0.0  | 0.0  | 3.6  | 0.0  | 0.0  | 0.0  | 3.6  | 0.0  | 0.0  | 0.0  | 0.0  | 3.6  | 0.0  | 0.0  | 0.0  | 3.6  | 0.0  | 82.1 | 0.0  | 0.0  | 0.0  | 0.0  | 0.0  | 3.6  |
|              | 21 | 0.0               | 0.0  | 0.0  | 0.0  | 0.0  | 0.0  | 0.0  | 0.0  | 0.0  | 0.0  | 0.0  | 0.0  | 0.0  | 0.0  | 0.0  | 0.0  | 0.0  | 0.0  | 0.0  | 0.0  | 87.0 | 0.0  | 0.0  | 0.0  | 13.0 | 0.0  |
|              | 22 | 3.1               | 3.1  | 0.0  | 0.0  | 0.0  | 3.1  | 3.1  | 0.0  | 0.0  | 3.1  | 0.0  | 0.0  | 3.1  | 0.0  | 0.0  | 0.0  | 0.0  | 0.0  | 0.0  | 0.0  | 0.0  | 81.3 | 0.0  | 0.0  | 0.0  | 0.0  |
|              | 23 | 0.0               | 4.2  | 0.0  | 0.0  | 0.0  | 0.0  | 4.2  | 0.0  | 0.0  | 0.0  | 0.0  | 0.0  | 0.0  | 4.2  | 0.0  | 0.0  | 0.0  | 0.0  | 4.2  | 0.0  | 0.0  | 0.0  | 79.2 | 0.0  | 0.0  | 4.2  |
|              | 24 | 0.0               | 2.4  | 0.0  | 0.0  | 0.0  | 0.0  | 0.0  | 0.0  | 0.0  | 2.4  | 0.0  | 0.0  | 0.0  | 0.0  | 0.0  | 0.0  | 0.0  | 0.0  | 0.0  | 0.0  | 2.4  | 0.0  | 0.0  | 92.9 | 0.0  | 0.0  |
|              | 25 | 0.0               | 2.5  | 0.0  | 0.0  | 2.5  | 0.0  | 0.0  | 0.0  | 0.0  | 0.0  | 15.0 | 0.0  | 0.0  | 0.0  | 0.0  | 0.0  | 0.0  | 0.0  | 5.0  | 0.0  | 0.0  | 0.0  | 0.0  | 0.0  | 75.0 | 0.0  |
|              | 26 | 0.0               | 0.0  | 0.0  | 0.0  | 0.0  | 0.0  | 0.0  | 0.0  | 4.2  | 4.2  | 0.0  | 0.0  | 0.0  | 0.0  | 0.0  | 0.0  | 0.0  | 0.0  | 0.0  | 0.0  | 20.8 | 4.2  | 0.0  | 4.2  | 0.0  | 62.5 |

**Table S7.** Confusion matrix of the ResNet18 model for the classification of the 26 Amazon parrot species.

|              |    | Predicted Results |       |      |      |      |      |      |      |       |      |      |      |      |      |      |      |      |      |      |      |      |      |      |      |     |      |
|--------------|----|-------------------|-------|------|------|------|------|------|------|-------|------|------|------|------|------|------|------|------|------|------|------|------|------|------|------|-----|------|
| True Results |    | 1                 | 2     | 3    | 4    | 5    | 6    | 7    | 8    | 9     | 10   | 11   | 12   | 13   | 14   | 15   | 16   | 17   | 18   | 19   | 20   | 21   | 22   | 23   | 24   | 25  | 26   |
|              | 1  | 93.8              | 0.0   | 0.0  | 0.0  | 0.0  | 4.2  | 0.0  | 0.0  | 0.0   | 0.0  | 2.1  | 0.0  | 0.0  | 0.0  | 0.0  | 0.0  | 0.0  | 0.0  | 0.0  | 0.0  | 0.0  | 0.0  | 0.0  | 0.0  | 0.0 | 0.0  |
|              | 2  | 0.0               | 100.0 | 0.0  | 0.0  | 0.0  | 0.0  | 0.0  | 0.0  | 0.0   | 0.0  | 0.0  | 0.0  | 0.0  | 0.0  | 0.0  | 0.0  | 0.0  | 0.0  | 0.0  | 0.0  | 0.0  | 0.0  | 0.0  | 0.0  | 0.0 | 0.0  |
|              | 3  | 3.2               | 0.0   | 96.8 | 0.0  | 0.0  | 0.0  | 0.0  | 0.0  | 0.0   | 0.0  | 0.0  | 0.0  | 0.0  | 0.0  | 0.0  | 0.0  | 0.0  | 0.0  | 0.0  | 0.0  | 0.0  | 0.0  | 0.0  | 0.0  | 0.0 | 0.0  |
|              | 4  | 2.1               | 0.0   | 0.0  | 89.4 | 0.0  | 0.0  | 0.0  | 0.0  | 0.0   | 0.0  | 0.0  | 0.0  | 0.0  | 0.0  | 0.0  | 0.0  | 8.5  | 0.0  | 0.0  | 0.0  | 0.0  | 0.0  | 0.0  | 0.0  | 0.0 | 0.0  |
|              | 5  | 0.0               | 2.3   | 0.0  | 0.0  | 86.4 | 0.0  | 0.0  | 0.0  | 0.0   | 0.0  | 0.0  | 0.0  | 0.0  | 0.0  | 2.3  | 0.0  | 0.0  | 0.0  | 0.0  | 2.3  | 2.3  | 0.0  | 0.0  | 0.0  | 4.5 | 0.0  |
|              | 6  | 8.3               | 0.0   | 0.0  | 0.0  | 0.0  | 77.8 | 0.0  | 0.0  | 0.0   | 0.0  | 0.0  | 0.0  | 0.0  | 0.0  | 0.0  | 0.0  | 2.8  | 11.1 | 0.0  | 0.0  | 0.0  | 0.0  | 0.0  | 0.0  | 0.0 | 0.0  |
|              | 7  | 0.0               | 0.0   | 2.8  | 0.0  | 0.0  | 0.0  | 86.1 | 0.0  | 0.0   | 0.0  | 0.0  | 0.0  | 0.0  | 0.0  | 2.8  | 2.8  | 0.0  | 0.0  | 0.0  | 0.0  | 0.0  | 0.0  | 0.0  | 0.0  | 5.6 | 0.0  |
|              | 8  | 0.0               | 0.0   | 0.0  | 0.0  | 0.0  | 16.7 | 0.0  | 83.3 | 0.0   | 0.0  | 0.0  | 0.0  | 0.0  | 0.0  | 0.0  | 0.0  | 0.0  | 0.0  | 0.0  | 0.0  | 0.0  | 0.0  | 0.0  | 0.0  | 0.0 | 0.0  |
|              | 9  | 0.0               | 0.0   | 0.0  | 0.0  | 0.0  | 0.0  | 0.0  | 0.0  | 100.0 | 0.0  | 0.0  | 0.0  | 0.0  | 0.0  | 0.0  | 0.0  | 0.0  | 0.0  | 0.0  | 0.0  | 0.0  | 0.0  | 0.0  | 0.0  | 0.0 | 0.0  |
|              | 10 | 0.0               | 0.0   | 0.0  | 0.0  | 0.0  | 0.0  | 4.8  | 0.0  | 0.0   | 90.5 | 4.8  | 0.0  | 0.0  | 0.0  | 0.0  | 0.0  | 0.0  | 0.0  | 0.0  | 0.0  | 0.0  | 0.0  | 0.0  | 0.0  | 0.0 | 0.0  |
|              | 11 | 0.0               | 0.0   | 0.0  | 0.0  | 0.0  | 0.0  | 0.0  | 0.0  | 0.0   | 0.0  | 92.0 | 0.0  | 0.0  | 0.0  | 2.0  | 0.0  | 0.0  | 0.0  | 0.0  | 0.0  | 0.0  | 2.0  | 0.0  | 0.0  | 4.0 | 0.0  |
|              | 12 | 0.0               | 0.0   | 0.0  | 0.0  | 0.0  | 0.0  | 0.0  | 0.0  | 0.0   | 5.3  | 0.0  | 84.2 | 0.0  | 0.0  | 0.0  | 5.3  | 5.3  | 0.0  | 0.0  | 0.0  | 0.0  | 0.0  | 0.0  | 0.0  | 0.0 | 0.0  |
|              | 13 | 0.0               | 0.0   | 0.0  | 0.0  | 0.0  | 0.0  | 0.0  | 0.0  | 0.0   | 0.0  | 0.0  | 0.0  | 92.3 | 0.0  | 0.0  | 0.0  | 0.0  | 0.0  | 0.0  | 0.0  | 0.0  | 3.8  | 3.8  | 0.0  | 0.0 | 0.0  |
|              | 14 | 0.0               | 0.0   | 0.0  | 0.0  | 0.0  | 0.0  | 0.0  | 0.0  | 0.0   | 0.0  | 0.0  | 3.3  | 1.6  | 91.8 | 0.0  | 0.0  | 0.0  | 0.0  | 0.0  | 0.0  | 0.0  | 0.0  | 0.0  | 1.6  | 0.0 | 1.6  |
|              | 15 | 0.0               | 0.0   | 0.0  | 0.0  | 0.0  | 0.0  | 0.0  | 0.0  | 0.0   | 0.0  | 0.0  | 0.0  | 0.0  | 0.0  | 94.4 | 0.0  | 0.0  | 0.0  | 0.0  | 5.6  | 0.0  | 0.0  | 0.0  | 0.0  | 0.0 | 0.0  |
|              | 16 | 0.0               | 0.0   | 0.0  | 11.1 | 0.0  | 0.0  | 0.0  | 0.0  | 0.0   | 0.0  | 0.0  | 0.0  | 0.0  | 0.0  | 0.0  | 88.9 | 0.0  | 0.0  | 0.0  | 0.0  | 0.0  | 0.0  | 0.0  | 0.0  | 0.0 | 0.0  |
|              | 17 | 2.3               | 0.0   | 0.0  | 2.3  | 0.0  | 0.0  | 0.0  | 0.0  | 0.0   | 0.0  | 0.0  | 2.3  | 0.0  | 0.0  | 0.0  | 0.0  | 90.9 | 0.0  | 0.0  | 0.0  | 2.3  | 0.0  | 0.0  | 0.0  | 0.0 | 0.0  |
|              | 18 | 3.6               | 0.0   | 0.0  | 1.8  | 0.0  | 1.8  | 0.0  | 0.0  | 0.0   | 0.0  | 0.0  | 0.0  | 0.0  | 0.0  | 0.0  | 0.0  | 0.0  | 92.9 | 0.0  | 0.0  | 0.0  | 0.0  | 0.0  | 0.0  | 0.0 | 0.0  |
|              | 19 | 0.0               | 4.8   | 0.0  | 0.0  | 0.0  | 0.0  | 0.0  | 0.0  | 0.0   | 0.0  | 0.0  | 0.0  | 0.0  | 0.0  | 0.0  | 0.0  | 0.0  | 0.0  | 95.2 | 0.0  | 0.0  | 0.0  | 0.0  | 0.0  | 0.0 | 0.0  |
|              | 20 | 0.0               | 0.0   | 0.0  | 3.6  | 3.6  | 0.0  | 0.0  | 0.0  | 3.6   | 0.0  | 0.0  | 0.0  | 3.6  | 0.0  | 0.0  | 0.0  | 0.0  | 0.0  | 0.0  | 82.1 | 0.0  | 0.0  | 0.0  | 0.0  | 3.6 | 0.0  |
|              | 21 | 0.0               | 0.0   | 0.0  | 0.0  | 0.0  | 0.0  | 0.0  | 0.0  | 0.0   | 0.0  | 0.0  | 0.0  | 0.0  | 0.0  | 0.0  | 4.3  | 0.0  | 0.0  | 0.0  | 0.0  | 91.3 | 0.0  | 0.0  | 0.0  | 4.3 | 0.0  |
|              | 22 | 0.0               | 0.0   | 0.0  | 0.0  | 0.0  | 0.0  | 0.0  | 0.0  | 0.0   | 0.0  | 0.0  | 3.1  | 0.0  | 0.0  | 0.0  | 0.0  | 3.1  | 0.0  | 0.0  | 0.0  | 0.0  | 90.6 | 0.0  | 3.1  | 0.0 | 0.0  |
|              | 23 | 4.2               | 0.0   | 0.0  | 0.0  | 0.0  | 0.0  | 0.0  | 0.0  | 0.0   | 0.0  | 0.0  | 0.0  | 0.0  | 0.0  | 0.0  | 0.0  | 4.2  | 0.0  | 0.0  | 4.2  | 0.0  | 0.0  | 87.5 | 0.0  | 0.0 | 0.0  |
|              | 24 | 2.4               | 0.0   | 0.0  | 0.0  | 2.4  | 0.0  | 0.0  | 0.0  | 0.0   | 0.0  | 0.0  | 0.0  | 0.0  | 0.0  | 0.0  | 0.0  | 0.0  | 0.0  | 0.0  | 0.0  | 4.8  | 2.4  | 0.0  | 83.3 | 0.0 | 4.8  |
|              | 25 | 0.0               | 0.0   | 0.0  | 0.0  | 0.0  | 0.0  | 0.0  | 0.0  | 0.0   | 0.0  | 2.5  | 0.0  | 0.0  | 0.0  | 0.0  | 0.0  | 0.0  | 0.0  | 0.0  | 0.0  | 0.0  | 0.0  | 0.0  | 97.5 | 0.0 | 0.0  |
|              | 26 | 0.0               | 0.0   | 0.0  | 0.0  | 0.0  | 0.0  | 0.0  | 0.0  | 0.0   | 4.2  | 4.2  | 0.0  | 0.0  | 0.0  | 0.0  | 0.0  | 0.0  | 0.0  | 0.0  | 0.0  | 12.5 | 4.2  | 0.0  | 0.0  | 4.2 | 70.8 |



**Table S8.** Confusion matrix of the ResNet34 model for the classification of the 26 Amazon parrot species.

|              |    | Predicted Results |      |      |      |      |      |      |      |       |      |      |      |      |      |      |      |      |      |      |      |      |      |      |      |      |      |
|--------------|----|-------------------|------|------|------|------|------|------|------|-------|------|------|------|------|------|------|------|------|------|------|------|------|------|------|------|------|------|
| True Results |    | 1                 | 2    | 3    | 4    | 5    | 6    | 7    | 8    | 9     | 10   | 11   | 12   | 13   | 14   | 15   | 16   | 17   | 18   | 19   | 20   | 21   | 22   | 23   | 24   | 25   | 26   |
|              | 1  | 91.7              | 0.0  | 0.0  | 0.0  | 0.0  | 2.1  | 0.0  | 0.0  | 0.0   | 0.0  | 2.1  | 0.0  | 0.0  | 0.0  | 0.0  | 0.0  | 4.2  | 0.0  | 0.0  | 0.0  | 0.0  | 0.0  | 0.0  | 0.0  | 0.0  | 0.0  |
|              | 2  | 0.0               | 95.7 | 0.0  | 0.0  | 0.0  | 0.0  | 0.0  | 0.0  | 0.0   | 0.0  | 0.0  | 0.0  | 0.0  | 4.3  | 0.0  | 0.0  | 0.0  | 0.0  | 0.0  | 0.0  | 0.0  | 0.0  | 0.0  | 0.0  | 0.0  | 0.0  |
|              | 3  | 3.2               | 0.0  | 96.8 | 0.0  | 0.0  | 0.0  | 0.0  | 0.0  | 0.0   | 0.0  | 0.0  | 0.0  | 0.0  | 0.0  | 0.0  | 0.0  | 0.0  | 0.0  | 0.0  | 0.0  | 0.0  | 0.0  | 0.0  | 0.0  | 0.0  | 0.0  |
|              | 4  | 0.0               | 0.0  | 0.0  | 85.1 | 0.0  | 0.0  | 0.0  | 0.0  | 0.0   | 2.1  | 0.0  | 2.1  | 0.0  | 0.0  | 0.0  | 2.1  | 6.4  | 2.1  | 0.0  | 0.0  | 0.0  | 0.0  | 0.0  | 0.0  | 0.0  | 0.0  |
|              | 5  | 0.0               | 0.0  | 0.0  | 0.0  | 86.4 | 0.0  | 0.0  | 0.0  | 0.0   | 0.0  | 6.8  | 0.0  | 0.0  | 0.0  | 0.0  | 0.0  | 0.0  | 0.0  | 2.3  | 2.3  | 0.0  | 0.0  | 0.0  | 0.0  | 2.3  | 0.0  |
|              | 6  | 8.3               | 0.0  | 2.8  | 0.0  | 2.8  | 77.8 | 0.0  | 0.0  | 0.0   | 0.0  | 0.0  | 0.0  | 0.0  | 0.0  | 0.0  | 0.0  | 0.0  | 5.6  | 0.0  | 0.0  | 0.0  | 2.8  | 0.0  | 0.0  | 0.0  | 0.0  |
|              | 7  | 0.0               | 0.0  | 2.8  | 0.0  | 0.0  | 0.0  | 86.1 | 0.0  | 0.0   | 0.0  | 0.0  | 0.0  | 0.0  | 0.0  | 0.0  | 0.0  | 0.0  | 0.0  | 0.0  | 5.6  | 2.8  | 2.8  | 0.0  | 0.0  | 0.0  | 0.0  |
|              | 8  | 0.0               | 0.0  | 0.0  | 0.0  | 0.0  | 0.0  | 5.6  | 83.3 | 0.0   | 0.0  | 5.6  | 0.0  | 0.0  | 0.0  | 0.0  | 0.0  | 0.0  | 0.0  | 0.0  | 0.0  | 0.0  | 0.0  | 5.6  | 0.0  | 0.0  | 0.0  |
|              | 9  | 0.0               | 0.0  | 0.0  | 0.0  | 0.0  | 0.0  | 0.0  | 0.0  | 100.0 | 0.0  | 0.0  | 0.0  | 0.0  | 0.0  | 0.0  | 0.0  | 0.0  | 0.0  | 0.0  | 0.0  | 0.0  | 0.0  | 0.0  | 0.0  | 0.0  | 0.0  |
|              | 10 | 0.0               | 0.0  | 0.0  | 0.0  | 0.0  | 0.0  | 0.0  | 0.0  | 0.0   | 81.0 | 4.8  | 4.8  | 0.0  | 0.0  | 0.0  | 0.0  | 0.0  | 0.0  | 0.0  | 0.0  | 0.0  | 0.0  | 0.0  | 4.8  | 0.0  | 4.8  |
|              | 11 | 0.0               | 0.0  | 0.0  | 0.0  | 0.0  | 0.0  | 0.0  | 0.0  | 0.0   | 2.0  | 90.0 | 0.0  | 0.0  | 0.0  | 2.0  | 0.0  | 0.0  | 0.0  | 0.0  | 0.0  | 0.0  | 0.0  | 0.0  | 0.0  | 6.0  | 0.0  |
|              | 12 | 0.0               | 0.0  | 0.0  | 0.0  | 0.0  | 0.0  | 0.0  | 0.0  | 0.0   | 0.0  | 0.0  | 89.5 | 0.0  | 0.0  | 0.0  | 0.0  | 0.0  | 0.0  | 0.0  | 0.0  | 0.0  | 10.5 | 0.0  | 0.0  | 0.0  | 0.0  |
|              | 13 | 0.0               | 0.0  | 0.0  | 0.0  | 0.0  | 3.8  | 0.0  | 0.0  | 0.0   | 0.0  | 0.0  | 0.0  | 92.3 | 0.0  | 0.0  | 0.0  | 0.0  | 0.0  | 0.0  | 0.0  | 0.0  | 3.8  | 0.0  | 0.0  | 0.0  | 0.0  |
|              | 14 | 0.0               | 1.6  | 1.6  | 0.0  | 0.0  | 0.0  | 0.0  | 0.0  | 0.0   | 0.0  | 0.0  | 1.6  | 1.6  | 91.8 | 0.0  | 0.0  | 0.0  | 0.0  | 0.0  | 0.0  | 0.0  | 0.0  | 0.0  | 0.0  | 0.0  | 1.6  |
|              | 15 | 0.0               | 0.0  | 0.0  | 0.0  | 5.6  | 0.0  | 0.0  | 0.0  | 0.0   | 0.0  | 0.0  | 0.0  | 0.0  | 0.0  | 88.9 | 0.0  | 0.0  | 0.0  | 0.0  | 5.6  | 0.0  | 0.0  | 0.0  | 0.0  | 0.0  | 0.0  |
|              | 16 | 0.0               | 0.0  | 0.0  | 0.0  | 0.0  | 0.0  | 0.0  | 0.0  | 0.0   | 0.0  | 0.0  | 16.7 | 0.0  | 0.0  | 0.0  | 72.2 | 0.0  | 0.0  | 0.0  | 0.0  | 0.0  | 11.1 | 0.0  | 0.0  | 0.0  | 0.0  |
|              | 17 | 0.0               | 0.0  | 0.0  | 6.8  | 0.0  | 0.0  | 0.0  | 0.0  | 2.3   | 0.0  | 0.0  | 4.5  | 2.3  | 0.0  | 0.0  | 0.0  | 81.8 | 0.0  | 0.0  | 0.0  | 2.3  | 0.0  | 0.0  | 0.0  | 0.0  | 0.0  |
|              | 18 | 3.6               | 0.0  | 0.0  | 0.0  | 0.0  | 5.4  | 0.0  | 0.0  | 0.0   | 0.0  | 0.0  | 0.0  | 0.0  | 0.0  | 0.0  | 0.0  | 0.0  | 85.7 | 3.6  | 0.0  | 0.0  | 0.0  | 0.0  | 0.0  | 1.8  | 0.0  |
|              | 19 | 0.0               | 9.5  | 0.0  | 0.0  | 0.0  | 0.0  | 0.0  | 0.0  | 0.0   | 0.0  | 0.0  | 0.0  | 0.0  | 0.0  | 0.0  | 0.0  | 0.0  | 0.0  | 90.5 | 0.0  | 0.0  | 0.0  | 0.0  | 0.0  | 0.0  | 0.0  |
|              | 20 | 0.0               | 0.0  | 0.0  | 0.0  | 17.9 | 0.0  | 0.0  | 0.0  | 0.0   | 0.0  | 0.0  | 0.0  | 0.0  | 0.0  | 0.0  | 0.0  | 0.0  | 0.0  | 0.0  | 82.1 | 0.0  | 0.0  | 0.0  | 0.0  | 0.0  | 0.0  |
|              | 21 | 0.0               | 0.0  | 0.0  | 0.0  | 0.0  | 0.0  | 0.0  | 0.0  | 0.0   | 0.0  | 0.0  | 0.0  | 0.0  | 0.0  | 0.0  | 0.0  | 0.0  | 0.0  | 0.0  | 0.0  | 78.3 | 0.0  | 0.0  | 0.0  | 21.7 | 0.0  |
|              | 22 | 3.1               | 0.0  | 0.0  | 0.0  | 0.0  | 0.0  | 0.0  | 3.1  | 0.0   | 0.0  | 0.0  | 0.0  | 3.1  | 0.0  | 0.0  | 3.1  | 0.0  | 0.0  | 0.0  | 0.0  | 0.0  | 78.1 | 9.4  | 0.0  | 0.0  | 0.0  |
|              | 23 | 0.0               | 0.0  | 0.0  | 0.0  | 0.0  | 0.0  | 8.3  | 4.2  | 0.0   | 0.0  | 0.0  | 0.0  | 0.0  | 0.0  | 0.0  | 0.0  | 0.0  | 0.0  | 0.0  | 0.0  | 0.0  | 0.0  | 87.5 | 0.0  | 0.0  | 0.0  |
|              | 24 | 0.0               | 4.8  | 0.0  | 0.0  | 0.0  | 0.0  | 4.8  | 0.0  | 0.0   | 0.0  | 2.4  | 0.0  | 0.0  | 0.0  | 0.0  | 0.0  | 2.4  | 0.0  | 0.0  | 0.0  | 0.0  | 2.4  | 2.4  | 81.0 | 0.0  | 0.0  |
|              | 25 | 0.0               | 0.0  | 0.0  | 0.0  | 2.5  | 0.0  | 0.0  | 0.0  | 0.0   | 0.0  | 12.5 | 0.0  | 0.0  | 0.0  | 0.0  | 0.0  | 0.0  | 0.0  | 0.0  | 0.0  | 0.0  | 0.0  | 0.0  | 0.0  | 85.0 | 0.0  |
|              | 26 | 0.0               | 0.0  | 0.0  | 0.0  | 0.0  | 0.0  | 0.0  | 0.0  | 0.0   | 0.0  | 0.0  | 4.2  | 0.0  | 0.0  | 0.0  | 0.0  | 0.0  | 0.0  | 0.0  | 0.0  | 8.3  | 0.0  | 0.0  | 0.0  | 4.2  | 83.3 |

**Table S9.** Confusion matrix of the ResNet50 model for the classification of the 26 Amazon parrot species.

|              | Predicted Results |      |       |      |      |      |      |      |      |       |      |      |      |      |      |      |      |      |      |      |      |      |      |      |      |      |
|--------------|-------------------|------|-------|------|------|------|------|------|------|-------|------|------|------|------|------|------|------|------|------|------|------|------|------|------|------|------|
|              | 1                 | 2    | 3     | 4    | 5    | 6    | 7    | 8    | 9    | 10    | 11   | 12   | 13   | 14   | 15   | 16   | 17   | 18   | 19   | 20   | 21   | 22   | 23   | 24   | 25   | 26   |
| True Results | 1                 | 87.5 | 0.0   | 6.3  | 0.0  | 0.0  | 2.1  | 0.0  | 0.0  | 0.0   | 0.0  | 2.1  | 0.0  | 0.0  | 0.0  | 0.0  | 0.0  | 2.1  | 0.0  | 0.0  | 0.0  | 0.0  | 0.0  | 0.0  | 0.0  | 0.0  |
|              | 2                 | 0.0  | 100.0 | 0.0  | 0.0  | 0.0  | 0.0  | 0.0  | 0.0  | 0.0   | 0.0  | 0.0  | 0.0  | 0.0  | 0.0  | 0.0  | 0.0  | 0.0  | 0.0  | 0.0  | 0.0  | 0.0  | 0.0  | 0.0  | 0.0  | 0.0  |
|              | 3                 | 3.2  | 0.0   | 96.8 | 0.0  | 0.0  | 0.0  | 0.0  | 0.0  | 0.0   | 0.0  | 0.0  | 0.0  | 0.0  | 0.0  | 0.0  | 0.0  | 0.0  | 0.0  | 0.0  | 0.0  | 0.0  | 0.0  | 0.0  | 0.0  | 0.0  |
|              | 4                 | 0.0  | 0.0   | 0.0  | 76.6 | 0.0  | 0.0  | 0.0  | 0.0  | 2.1   | 0.0  | 0.0  | 2.1  | 0.0  | 0.0  | 0.0  | 19.1 | 0.0  | 0.0  | 0.0  | 0.0  | 0.0  | 0.0  | 0.0  | 0.0  | 0.0  |
|              | 5                 | 0.0  | 0.0   | 0.0  | 0.0  | 90.9 | 0.0  | 0.0  | 0.0  | 0.0   | 0.0  | 0.0  | 0.0  | 0.0  | 0.0  | 0.0  | 0.0  | 0.0  | 0.0  | 0.0  | 0.0  | 0.0  | 0.0  | 2.3  | 4.5  | 2.3  |
|              | 6                 | 13.9 | 0.0   | 0.0  | 0.0  | 0.0  | 69.4 | 0.0  | 0.0  | 0.0   | 0.0  | 0.0  | 0.0  | 0.0  | 0.0  | 0.0  | 2.8  | 11.1 | 0.0  | 0.0  | 0.0  | 2.8  | 0.0  | 0.0  | 0.0  | 0.0  |
|              | 7                 | 0.0  | 0.0   | 0.0  | 0.0  | 0.0  | 0.0  | 94.4 | 0.0  | 0.0   | 0.0  | 0.0  | 0.0  | 0.0  | 0.0  | 0.0  | 0.0  | 0.0  | 0.0  | 2.8  | 0.0  | 0.0  | 0.0  | 0.0  | 0.0  | 2.8  |
|              | 8                 | 5.6  | 0.0   | 5.6  | 0.0  | 0.0  | 0.0  | 0.0  | 83.3 | 0.0   | 0.0  | 0.0  | 0.0  | 0.0  | 0.0  | 0.0  | 0.0  | 0.0  | 0.0  | 0.0  | 0.0  | 0.0  | 5.6  | 0.0  | 0.0  | 0.0  |
|              | 9                 | 0.0  | 0.0   | 0.0  | 0.0  | 0.0  | 0.0  | 0.0  | 0.0  | 100.0 | 0.0  | 0.0  | 0.0  | 0.0  | 0.0  | 0.0  | 0.0  | 0.0  | 0.0  | 0.0  | 0.0  | 0.0  | 0.0  | 0.0  | 0.0  | 0.0  |
|              | 10                | 0.0  | 0.0   | 0.0  | 0.0  | 0.0  | 0.0  | 0.0  | 0.0  | 0.0   | 85.7 | 0.0  | 0.0  | 0.0  | 0.0  | 0.0  | 0.0  | 0.0  | 0.0  | 4.8  | 0.0  | 0.0  | 0.0  | 4.8  | 0.0  | 4.8  |
|              | 11                | 0.0  | 0.0   | 2.0  | 0.0  | 0.0  | 0.0  | 0.0  | 0.0  | 0.0   | 0.0  | 90.0 | 0.0  | 0.0  | 2.0  | 0.0  | 0.0  | 0.0  | 0.0  | 0.0  | 0.0  | 0.0  | 0.0  | 0.0  | 6.0  | 0.0  |
|              | 12                | 0.0  | 0.0   | 0.0  | 0.0  | 0.0  | 0.0  | 0.0  | 0.0  | 0.0   | 0.0  | 0.0  | 84.2 | 0.0  | 0.0  | 10.5 | 5.3  | 0.0  | 0.0  | 0.0  | 0.0  | 0.0  | 0.0  | 0.0  | 0.0  | 0.0  |
|              | 13                | 0.0  | 0.0   | 0.0  | 0.0  | 0.0  | 0.0  | 0.0  | 0.0  | 0.0   | 0.0  | 3.8  | 92.3 | 0.0  | 0.0  | 0.0  | 0.0  | 0.0  | 0.0  | 0.0  | 0.0  | 3.8  | 0.0  | 0.0  | 0.0  | 0.0  |
|              | 14                | 0.0  | 0.0   | 0.0  | 0.0  | 0.0  | 0.0  | 0.0  | 0.0  | 0.0   | 0.0  | 3.3  | 0.0  | 91.8 | 0.0  | 0.0  | 3.3  | 0.0  | 0.0  | 0.0  | 0.0  | 0.0  | 0.0  | 0.0  | 0.0  | 1.6  |
|              | 15                | 0.0  | 0.0   | 0.0  | 0.0  | 5.6  | 0.0  | 0.0  | 0.0  | 0.0   | 0.0  | 0.0  | 0.0  | 0.0  | 88.9 | 0.0  | 0.0  | 0.0  | 0.0  | 5.6  | 0.0  | 0.0  | 0.0  | 0.0  | 0.0  | 0.0  |
|              | 16                | 0.0  | 0.0   | 5.6  | 11.1 | 0.0  | 0.0  | 0.0  | 0.0  | 0.0   | 0.0  | 5.6  | 0.0  | 0.0  | 0.0  | 77.8 | 0.0  | 0.0  | 0.0  | 0.0  | 0.0  | 0.0  | 0.0  | 0.0  | 0.0  | 0.0  |
|              | 17                | 0.0  | 0.0   | 0.0  | 6.8  | 0.0  | 0.0  | 0.0  | 0.0  | 0.0   | 0.0  | 0.0  | 0.0  | 0.0  | 0.0  | 0.0  | 86.4 | 2.3  | 0.0  | 0.0  | 2.3  | 0.0  | 2.3  | 0.0  | 0.0  | 0.0  |
|              | 18                | 3.6  | 1.8   | 0.0  | 0.0  | 0.0  | 3.6  | 0.0  | 0.0  | 0.0   | 0.0  | 0.0  | 0.0  | 0.0  | 0.0  | 0.0  | 0.0  | 91.1 | 0.0  | 0.0  | 0.0  | 0.0  | 0.0  | 0.0  | 0.0  | 0.0  |
|              | 19                | 0.0  | 14.3  | 0.0  | 0.0  | 0.0  | 0.0  | 0.0  | 0.0  | 0.0   | 0.0  | 0.0  | 0.0  | 0.0  | 0.0  | 0.0  | 0.0  | 0.0  | 85.7 | 0.0  | 0.0  | 0.0  | 0.0  | 0.0  | 0.0  | 0.0  |
|              | 20                | 0.0  | 0.0   | 0.0  | 0.0  | 7.1  | 0.0  | 3.6  | 0.0  | 0.0   | 0.0  | 0.0  | 0.0  | 0.0  | 0.0  | 0.0  | 0.0  | 0.0  | 0.0  | 85.7 | 0.0  | 0.0  | 0.0  | 3.6  | 0.0  | 0.0  |
|              | 21                | 0.0  | 0.0   | 0.0  | 0.0  | 0.0  | 0.0  | 0.0  | 0.0  | 0.0   | 0.0  | 0.0  | 0.0  | 0.0  | 0.0  | 0.0  | 0.0  | 0.0  | 0.0  | 0.0  | 82.6 | 0.0  | 0.0  | 4.3  | 0.0  | 13.0 |
|              | 22                | 0.0  | 0.0   | 3.1  | 0.0  | 0.0  | 0.0  | 0.0  | 0.0  | 0.0   | 0.0  | 3.1  | 3.1  | 0.0  | 0.0  | 3.1  | 0.0  | 0.0  | 0.0  | 0.0  | 0.0  | 84.4 | 3.1  | 0.0  | 0.0  | 0.0  |
|              | 23                | 0.0  | 0.0   | 0.0  | 0.0  | 0.0  | 0.0  | 4.2  | 0.0  | 0.0   | 0.0  | 0.0  | 0.0  | 0.0  | 0.0  | 0.0  | 0.0  | 0.0  | 0.0  | 0.0  | 0.0  | 8.3  | 87.5 | 0.0  | 0.0  | 0.0  |
|              | 24                | 0.0  | 2.4   | 0.0  | 0.0  | 0.0  | 2.4  | 0.0  | 0.0  | 0.0   | 0.0  | 0.0  | 0.0  | 0.0  | 0.0  | 0.0  | 0.0  | 0.0  | 0.0  | 0.0  | 0.0  | 0.0  | 2.4  | 92.9 | 0.0  | 0.0  |
|              | 25                | 0.0  | 0.0   | 0.0  | 0.0  | 2.5  | 0.0  | 0.0  | 0.0  | 0.0   | 2.5  | 0.0  | 0.0  | 0.0  | 0.0  | 0.0  | 0.0  | 0.0  | 0.0  | 0.0  | 0.0  | 0.0  | 0.0  | 0.0  | 95.0 | 0.0  |
|              | 26                | 0.0  | 0.0   | 0.0  | 0.0  | 0.0  | 0.0  | 4.2  | 0.0  | 0.0   | 0.0  | 0.0  | 0.0  | 0.0  | 0.0  | 0.0  | 0.0  | 0.0  | 0.0  | 0.0  | 8.3  | 4.2  | 0.0  | 0.0  | 0.0  | 83.3 |

**Table S10.** Confusion matrix of the DenseNet18 model for the classification of the 26 Amazon parrot species.

|              | Predicted Results |      |      |      |      |      |      |      |       |       |      |       |      |      |      |      |      |      |      |      |      |      |      |      |      |      |
|--------------|-------------------|------|------|------|------|------|------|------|-------|-------|------|-------|------|------|------|------|------|------|------|------|------|------|------|------|------|------|
|              | 1                 | 2    | 3    | 4    | 5    | 6    | 7    | 8    | 9     | 10    | 11   | 12    | 13   | 14   | 15   | 16   | 17   | 18   | 19   | 20   | 21   | 22   | 23   | 24   | 25   | 26   |
| True Results | 1                 | 91.7 | 0.0  | 2.1  | 0.0  | 0.0  | 0.0  | 0.0  | 0.0   | 0.0   | 0.0  | 2.1   | 0.0  | 0.0  | 0.0  | 0.0  | 0.0  | 2.1  | 0.0  | 0.0  | 0.0  | 0.0  | 2.1  | 0.0  | 0.0  | 0.0  |
|              | 2                 | 0.0  | 93.6 | 0.0  | 0.0  | 2.1  | 0.0  | 0.0  | 0.0   | 0.0   | 0.0  | 0.0   | 0.0  | 2.1  | 0.0  | 0.0  | 0.0  | 0.0  | 2.1  | 0.0  | 0.0  | 0.0  | 0.0  | 0.0  | 0.0  | 0.0  |
|              | 3                 | 1.6  | 0.0  | 98.4 | 0.0  | 0.0  | 0.0  | 0.0  | 0.0   | 0.0   | 0.0  | 0.0   | 0.0  | 0.0  | 0.0  | 0.0  | 0.0  | 0.0  | 0.0  | 0.0  | 0.0  | 0.0  | 0.0  | 0.0  | 0.0  | 0.0  |
|              | 4                 | 0.0  | 0.0  | 0.0  | 93.6 | 0.0  | 0.0  | 0.0  | 0.0   | 0.0   | 0.0  | 0.0   | 0.0  | 0.0  | 0.0  | 0.0  | 6.4  | 0.0  | 0.0  | 0.0  | 0.0  | 0.0  | 0.0  | 0.0  | 0.0  | 0.0  |
|              | 5                 | 0.0  | 0.0  | 0.0  | 0.0  | 84.1 | 0.0  | 0.0  | 0.0   | 0.0   | 0.0  | 0.0   | 0.0  | 0.0  | 4.5  | 0.0  | 0.0  | 0.0  | 2.3  | 2.3  | 0.0  | 0.0  | 0.0  | 2.3  | 4.5  | 0.0  |
|              | 6                 | 8.3  | 0.0  | 0.0  | 0.0  | 0.0  | 75.0 | 0.0  | 0.0   | 0.0   | 0.0  | 0.0   | 0.0  | 0.0  | 0.0  | 0.0  | 2.8  | 13.9 | 0.0  | 0.0  | 0.0  | 0.0  | 0.0  | 0.0  | 0.0  | 0.0  |
|              | 7                 | 0.0  | 0.0  | 0.0  | 0.0  | 0.0  | 0.0  | 97.2 | 0.0   | 0.0   | 2.8  | 0.0   | 0.0  | 0.0  | 0.0  | 0.0  | 0.0  | 0.0  | 0.0  | 0.0  | 0.0  | 0.0  | 0.0  | 0.0  | 0.0  | 0.0  |
|              | 8                 | 0.0  | 0.0  | 0.0  | 0.0  | 0.0  | 0.0  | 0.0  | 100.0 | 0.0   | 0.0  | 0.0   | 0.0  | 0.0  | 0.0  | 0.0  | 0.0  | 0.0  | 0.0  | 0.0  | 0.0  | 0.0  | 0.0  | 0.0  | 0.0  | 0.0  |
|              | 9                 | 0.0  | 0.0  | 0.0  | 0.0  | 0.0  | 0.0  | 0.0  | 0.0   | 100.0 | 0.0  | 0.0   | 0.0  | 0.0  | 0.0  | 0.0  | 0.0  | 0.0  | 0.0  | 0.0  | 0.0  | 0.0  | 0.0  | 0.0  | 0.0  | 0.0  |
|              | 10                | 0.0  | 0.0  | 0.0  | 0.0  | 0.0  | 0.0  | 0.0  | 0.0   | 0.0   | 95.2 | 4.8   | 0.0  | 0.0  | 0.0  | 0.0  | 0.0  | 0.0  | 0.0  | 0.0  | 0.0  | 0.0  | 0.0  | 0.0  | 0.0  | 0.0  |
|              | 11                | 0.0  | 0.0  | 0.0  | 0.0  | 2.0  | 0.0  | 6.0  | 0.0   | 0.0   | 0.0  | 84.0  | 0.0  | 0.0  | 2.0  | 0.0  | 0.0  | 0.0  | 0.0  | 0.0  | 0.0  | 0.0  | 0.0  | 0.0  | 6.0  | 0.0  |
|              | 12                | 0.0  | 0.0  | 0.0  | 0.0  | 0.0  | 0.0  | 0.0  | 0.0   | 0.0   | 0.0  | 100.0 | 0.0  | 0.0  | 0.0  | 0.0  | 0.0  | 0.0  | 0.0  | 0.0  | 0.0  | 0.0  | 0.0  | 0.0  | 0.0  | 0.0  |
|              | 13                | 0.0  | 0.0  | 0.0  | 3.8  | 0.0  | 0.0  | 0.0  | 0.0   | 0.0   | 0.0  | 0.0   | 84.6 | 0.0  | 0.0  | 0.0  | 0.0  | 0.0  | 0.0  | 0.0  | 0.0  | 0.0  | 11.5 | 0.0  | 0.0  | 0.0  |
|              | 14                | 0.0  | 0.0  | 0.0  | 0.0  | 0.0  | 0.0  | 0.0  | 0.0   | 0.0   | 0.0  | 0.0   | 1.6  | 95.1 | 0.0  | 1.6  | 0.0  | 0.0  | 0.0  | 0.0  | 0.0  | 0.0  | 0.0  | 0.0  | 1.6  | 0.0  |
|              | 15                | 0.0  | 0.0  | 0.0  | 0.0  | 0.0  | 0.0  | 0.0  | 0.0   | 0.0   | 0.0  | 0.0   | 0.0  | 0.0  | 94.4 | 0.0  | 0.0  | 0.0  | 0.0  | 5.6  | 0.0  | 0.0  | 0.0  | 0.0  | 0.0  | 0.0  |
|              | 16                | 0.0  | 0.0  | 0.0  | 5.6  | 0.0  | 0.0  | 0.0  | 0.0   | 0.0   | 0.0  | 5.6   | 0.0  | 0.0  | 0.0  | 88.9 | 0.0  | 0.0  | 0.0  | 0.0  | 0.0  | 0.0  | 0.0  | 0.0  | 0.0  | 0.0  |
|              | 17                | 0.0  | 0.0  | 0.0  | 2.3  | 0.0  | 0.0  | 0.0  | 0.0   | 4.5   | 0.0  | 2.3   | 0.0  | 0.0  | 0.0  | 0.0  | 90.9 | 0.0  | 0.0  | 0.0  | 0.0  | 0.0  | 0.0  | 0.0  | 0.0  | 0.0  |
|              | 18                | 1.8  | 0.0  | 0.0  | 0.0  | 0.0  | 1.8  | 0.0  | 0.0   | 0.0   | 0.0  | 0.0   | 0.0  | 0.0  | 0.0  | 1.8  | 0.0  | 92.9 | 1.8  | 0.0  | 0.0  | 0.0  | 0.0  | 0.0  | 0.0  | 0.0  |
|              | 19                | 0.0  | 4.8  | 0.0  | 0.0  | 0.0  | 0.0  | 0.0  | 0.0   | 0.0   | 0.0  | 0.0   | 0.0  | 0.0  | 0.0  | 0.0  | 0.0  | 0.0  | 95.2 | 0.0  | 0.0  | 0.0  | 0.0  | 0.0  | 0.0  | 0.0  |
|              | 20                | 0.0  | 0.0  | 0.0  | 0.0  | 3.6  | 0.0  | 0.0  | 3.6   | 0.0   | 0.0  | 0.0   | 0.0  | 3.6  | 0.0  | 0.0  | 0.0  | 0.0  | 0.0  | 89.3 | 0.0  | 0.0  | 0.0  | 0.0  | 0.0  | 0.0  |
|              | 21                | 0.0  | 0.0  | 0.0  | 0.0  | 0.0  | 0.0  | 0.0  | 0.0   | 0.0   | 0.0  | 4.3   | 0.0  | 0.0  | 0.0  | 0.0  | 0.0  | 0.0  | 0.0  | 0.0  | 95.7 | 0.0  | 0.0  | 0.0  | 0.0  | 0.0  |
|              | 22                | 0.0  | 0.0  | 0.0  | 0.0  | 0.0  | 3.1  | 0.0  | 0.0   | 0.0   | 0.0  | 3.1   | 0.0  | 0.0  | 0.0  | 6.3  | 0.0  | 0.0  | 0.0  | 0.0  | 0.0  | 87.5 | 0.0  | 0.0  | 0.0  | 0.0  |
|              | 23                | 0.0  | 0.0  | 0.0  | 0.0  | 0.0  | 0.0  | 0.0  | 0.0   | 0.0   | 0.0  | 0.0   | 0.0  | 0.0  | 0.0  | 0.0  | 0.0  | 0.0  | 0.0  | 0.0  | 0.0  | 0.0  | 95.8 | 4.2  | 0.0  | 0.0  |
|              | 24                | 0.0  | 0.0  | 0.0  | 0.0  | 0.0  | 0.0  | 4.8  | 0.0   | 0.0   | 0.0  | 0.0   | 0.0  | 0.0  | 0.0  | 0.0  | 0.0  | 0.0  | 0.0  | 0.0  | 0.0  | 0.0  | 0.0  | 95.2 | 0.0  | 0.0  |
|              | 25                | 0.0  | 0.0  | 0.0  | 0.0  | 0.0  | 0.0  | 5.0  | 0.0   | 0.0   | 0.0  | 2.5   | 0.0  | 0.0  | 0.0  | 0.0  | 0.0  | 0.0  | 0.0  | 0.0  | 0.0  | 0.0  | 0.0  | 0.0  | 92.5 | 0.0  |
|              | 26                | 0.0  | 0.0  | 0.0  | 0.0  | 0.0  | 0.0  | 4.2  | 0.0   | 0.0   | 0.0  | 0.0   | 0.0  | 0.0  | 0.0  | 4.2  | 0.0  | 0.0  | 0.0  | 0.0  | 25.0 | 4.2  | 0.0  | 0.0  | 0.0  | 62.5 |

**Table S11.** Confusion matrix of the DenseNet30 model for the classification of the 26 Amazon parrot species.

|              |    | Predicted Results |      |      |      |      |      |      |      |       |     |      |      |      |      |      |      |      |      |       |     |      |      |      |      |      |      |
|--------------|----|-------------------|------|------|------|------|------|------|------|-------|-----|------|------|------|------|------|------|------|------|-------|-----|------|------|------|------|------|------|
| True Results |    | 1                 | 2    | 3    | 4    | 5    | 6    | 7    | 8    | 9     | 10  | 11   | 12   | 13   | 14   | 15   | 16   | 17   | 18   | 19    | 20  | 21   | 22   | 23   | 24   | 25   | 26   |
|              | 1  | 95.8              | 0.0  | 2.1  | 0.0  | 0.0  | 0.0  | 0.0  | 0.0  | 0.0   | 0.0 | 0.0  | 0.0  | 0.0  | 0.0  | 0.0  | 0.0  | 0.0  | 0.0  | 0.0   | 0.0 | 0.0  | 0.0  | 0.0  | 2.1  | 0.0  | 0.0  |
|              | 2  | 0.0               | 97.9 | 0.0  | 0.0  | 0.0  | 0.0  | 0.0  | 0.0  | 0.0   | 0.0 | 0.0  | 0.0  | 0.0  | 0.0  | 0.0  | 0.0  | 0.0  | 0.0  | 2.1   | 0.0 | 0.0  | 0.0  | 0.0  | 0.0  | 0.0  | 0.0  |
|              | 3  | 1.6               | 0.0  | 98.4 | 0.0  | 0.0  | 0.0  | 0.0  | 0.0  | 0.0   | 0.0 | 0.0  | 0.0  | 0.0  | 0.0  | 0.0  | 0.0  | 0.0  | 0.0  | 0.0   | 0.0 | 0.0  | 0.0  | 0.0  | 0.0  | 0.0  | 0.0  |
|              | 4  | 0.0               | 0.0  | 0.0  | 83.0 | 0.0  | 0.0  | 0.0  | 0.0  | 0.0   | 2.1 | 0.0  | 0.0  | 0.0  | 0.0  | 2.1  | 0.0  | 12.8 | 0.0  | 0.0   | 0.0 | 0.0  | 0.0  | 0.0  | 0.0  | 0.0  | 0.0  |
|              | 5  | 0.0               | 0.0  | 0.0  | 0.0  | 93.2 | 0.0  | 0.0  | 0.0  | 0.0   | 0.0 | 0.0  | 0.0  | 0.0  | 0.0  | 4.5  | 0.0  | 0.0  | 0.0  | 0.0   | 0.0 | 0.0  | 0.0  | 0.0  | 0.0  | 2.3  | 0.0  |
|              | 6  | 0.0               | 0.0  | 0.0  | 0.0  | 0.0  | 83.3 | 0.0  | 0.0  | 2.8   | 0.0 | 0.0  | 0.0  | 0.0  | 0.0  | 0.0  | 0.0  | 2.8  | 11.1 | 0.0   | 0.0 | 0.0  | 0.0  | 0.0  | 0.0  | 0.0  | 0.0  |
|              | 7  | 0.0               | 0.0  | 0.0  | 0.0  | 0.0  | 0.0  | 97.2 | 0.0  | 0.0   | 0.0 | 0.0  | 0.0  | 0.0  | 0.0  | 0.0  | 2.8  | 0.0  | 0.0  | 0.0   | 0.0 | 0.0  | 0.0  | 0.0  | 0.0  | 0.0  | 0.0  |
|              | 8  | 0.0               | 0.0  | 0.0  | 0.0  | 0.0  | 5.6  | 0.0  | 94.4 | 0.0   | 0.0 | 0.0  | 0.0  | 0.0  | 0.0  | 0.0  | 0.0  | 0.0  | 0.0  | 0.0   | 0.0 | 0.0  | 0.0  | 0.0  | 0.0  | 0.0  | 0.0  |
|              | 9  | 0.0               | 0.0  | 0.0  | 0.0  | 0.0  | 0.0  | 0.0  | 0.0  | 100.0 | 0.0 | 0.0  | 0.0  | 0.0  | 0.0  | 0.0  | 0.0  | 0.0  | 0.0  | 0.0   | 0.0 | 0.0  | 0.0  | 0.0  | 0.0  | 0.0  | 0.0  |
|              | 10 | 0.0               | 0.0  | 0.0  | 0.0  | 0.0  | 0.0  | 0.0  | 0.0  | 0.0   | 0.0 | 95.2 | 0.0  | 0.0  | 0.0  | 0.0  | 0.0  | 0.0  | 0.0  | 0.0   | 0.0 | 0.0  | 0.0  | 0.0  | 4.8  | 0.0  | 0.0  |
|              | 11 | 0.0               | 0.0  | 0.0  | 0.0  | 0.0  | 0.0  | 2.0  | 0.0  | 0.0   | 0.0 | 0.0  | 90.0 | 0.0  | 0.0  | 2.0  | 0.0  | 0.0  | 0.0  | 0.0   | 0.0 | 0.0  | 0.0  | 0.0  | 0.0  | 6.0  | 0.0  |
|              | 12 | 0.0               | 0.0  | 0.0  | 0.0  | 0.0  | 0.0  | 0.0  | 0.0  | 0.0   | 0.0 | 0.0  | 0.0  | 89.5 | 0.0  | 0.0  | 0.0  | 5.3  | 0.0  | 0.0   | 0.0 | 0.0  | 0.0  | 0.0  | 0.0  | 0.0  | 5.3  |
|              | 13 | 0.0               | 0.0  | 0.0  | 0.0  | 0.0  | 3.8  | 0.0  | 0.0  | 0.0   | 0.0 | 0.0  | 0.0  | 0.0  | 84.6 | 0.0  | 0.0  | 0.0  | 0.0  | 0.0   | 0.0 | 0.0  | 0.0  | 11.5 | 0.0  | 0.0  | 0.0  |
|              | 14 | 0.0               | 0.0  | 0.0  | 0.0  | 0.0  | 0.0  | 0.0  | 0.0  | 0.0   | 0.0 | 0.0  | 0.0  | 0.0  | 1.6  | 95.1 | 0.0  | 0.0  | 0.0  | 0.0   | 1.6 | 0.0  | 0.0  | 0.0  | 0.0  | 0.0  | 1.6  |
|              | 15 | 0.0               | 0.0  | 0.0  | 0.0  | 0.0  | 0.0  | 0.0  | 0.0  | 0.0   | 0.0 | 0.0  | 0.0  | 0.0  | 0.0  | 0.0  | 94.4 | 0.0  | 0.0  | 0.0   | 5.6 | 0.0  | 0.0  | 0.0  | 0.0  | 0.0  | 0.0  |
|              | 16 | 5.6               | 0.0  | 0.0  | 11.1 | 0.0  | 0.0  | 0.0  | 0.0  | 0.0   | 0.0 | 0.0  | 0.0  | 5.6  | 0.0  | 0.0  | 0.0  | 77.8 | 0.0  | 0.0   | 0.0 | 0.0  | 0.0  | 0.0  | 0.0  | 0.0  | 0.0  |
|              | 17 | 0.0               | 0.0  | 0.0  | 6.8  | 0.0  | 0.0  | 0.0  | 0.0  | 2.3   | 0.0 | 0.0  | 0.0  | 0.0  | 0.0  | 0.0  | 2.3  | 86.4 | 0.0  | 0.0   | 0.0 | 2.3  | 0.0  | 0.0  | 0.0  | 0.0  | 0.0  |
|              | 18 | 5.4               | 0.0  | 0.0  | 1.8  | 0.0  | 0.0  | 0.0  | 0.0  | 0.0   | 0.0 | 0.0  | 0.0  | 0.0  | 0.0  | 1.8  | 0.0  | 1.8  | 89.3 | 0.0   | 0.0 | 0.0  | 0.0  | 0.0  | 0.0  | 0.0  | 0.0  |
|              | 19 | 0.0               | 0.0  | 0.0  | 0.0  | 0.0  | 0.0  | 0.0  | 0.0  | 0.0   | 0.0 | 0.0  | 0.0  | 0.0  | 0.0  | 0.0  | 0.0  | 0.0  | 0.0  | 100.0 | 0.0 | 0.0  | 0.0  | 0.0  | 0.0  | 0.0  | 0.0  |
|              | 20 | 0.0               | 0.0  | 0.0  | 0.0  | 3.6  | 0.0  | 0.0  | 3.6  | 3.6   | 0.0 | 0.0  | 0.0  | 0.0  | 0.0  | 0.0  | 0.0  | 0.0  | 0.0  | 0.0   | 0.0 | 89.3 | 0.0  | 0.0  | 0.0  | 0.0  | 0.0  |
|              | 21 | 0.0               | 0.0  | 0.0  | 0.0  | 0.0  | 0.0  | 0.0  | 0.0  | 0.0   | 0.0 | 0.0  | 0.0  | 0.0  | 0.0  | 0.0  | 0.0  | 0.0  | 0.0  | 0.0   | 0.0 | 95.7 | 0.0  | 0.0  | 0.0  | 4.3  | 0.0  |
|              | 22 | 0.0               | 0.0  | 0.0  | 0.0  | 0.0  | 3.1  | 0.0  | 6.3  | 0.0   | 0.0 | 0.0  | 0.0  | 0.0  | 3.1  | 0.0  | 0.0  | 0.0  | 0.0  | 0.0   | 0.0 | 0.0  | 87.5 | 0.0  | 0.0  | 0.0  | 0.0  |
|              | 23 | 0.0               | 0.0  | 0.0  | 4.2  | 0.0  | 0.0  | 4.2  | 0.0  | 0.0   | 0.0 | 0.0  | 0.0  | 0.0  | 4.2  | 0.0  | 0.0  | 0.0  | 0.0  | 0.0   | 0.0 | 0.0  | 0.0  | 87.5 | 0.0  | 0.0  | 0.0  |
|              | 24 | 0.0               | 0.0  | 0.0  | 0.0  | 0.0  | 0.0  | 2.4  | 0.0  | 0.0   | 0.0 | 0.0  | 0.0  | 0.0  | 0.0  | 0.0  | 0.0  | 0.0  | 0.0  | 0.0   | 2.4 | 2.4  | 0.0  | 0.0  | 92.9 | 0.0  | 0.0  |
|              | 25 | 0.0               | 0.0  | 0.0  | 0.0  | 0.0  | 0.0  | 0.0  | 0.0  | 0.0   | 0.0 | 2.5  | 0.0  | 0.0  | 0.0  | 0.0  | 0.0  | 0.0  | 0.0  | 2.5   | 2.5 | 0.0  | 0.0  | 0.0  | 0.0  | 92.5 | 0.0  |
|              | 26 | 0.0               | 0.0  | 0.0  | 0.0  | 0.0  | 0.0  | 0.0  | 0.0  | 0.0   | 0.0 | 0.0  | 0.0  | 0.0  | 0.0  | 0.0  | 4.2  | 0.0  | 0.0  | 0.0   | 0.0 | 25.0 | 4.2  | 0.0  | 0.0  | 0.0  | 66.7 |

**Table S12.** Confusion matrix of the DenseNet50 model for the classification of the 26 Amazon parrot species.

|              |    | Predicted Results |      |      |      |      |      |      |      |      |       |      |      |      |      |      |      |      |      |      |      |      |      |      |      |     |      |
|--------------|----|-------------------|------|------|------|------|------|------|------|------|-------|------|------|------|------|------|------|------|------|------|------|------|------|------|------|-----|------|
| True Results |    | 1                 | 2    | 3    | 4    | 5    | 6    | 7    | 8    | 9    | 10    | 11   | 12   | 13   | 14   | 15   | 16   | 17   | 18   | 19   | 20   | 21   | 22   | 23   | 24   | 25  | 26   |
|              | 1  | 93.8              | 0.0  | 2.1  | 0.0  | 0.0  | 2.1  | 0.0  | 0.0  | 0.0  | 0.0   | 0.0  | 0.0  | 0.0  | 0.0  | 0.0  | 0.0  | 2.1  | 0.0  | 0.0  | 0.0  | 0.0  | 0.0  | 0.0  | 0.0  | 0.0 | 0.0  |
|              | 2  | 2.1               | 97.9 | 0.0  | 0.0  | 0.0  | 0.0  | 0.0  | 0.0  | 0.0  | 0.0   | 0.0  | 0.0  | 0.0  | 0.0  | 0.0  | 0.0  | 0.0  | 0.0  | 0.0  | 0.0  | 0.0  | 0.0  | 0.0  | 0.0  | 0.0 | 0.0  |
|              | 3  | 1.6               | 0.0  | 98.4 | 0.0  | 0.0  | 0.0  | 0.0  | 0.0  | 0.0  | 0.0   | 0.0  | 0.0  | 0.0  | 0.0  | 0.0  | 0.0  | 0.0  | 0.0  | 0.0  | 0.0  | 0.0  | 0.0  | 0.0  | 0.0  | 0.0 | 0.0  |
|              | 4  | 2.1               | 0.0  | 0.0  | 89.4 | 0.0  | 0.0  | 0.0  | 0.0  | 0.0  | 0.0   | 0.0  | 2.1  | 0.0  | 0.0  | 0.0  | 0.0  | 6.4  | 0.0  | 0.0  | 0.0  | 0.0  | 0.0  | 0.0  | 0.0  | 0.0 | 0.0  |
|              | 5  | 0.0               | 0.0  | 0.0  | 0.0  | 79.5 | 0.0  | 0.0  | 0.0  | 0.0  | 0.0   | 0.0  | 0.0  | 0.0  | 0.0  | 9.1  | 0.0  | 0.0  | 0.0  | 0.0  | 0.0  | 4.5  | 0.0  | 0.0  | 0.0  | 6.8 | 0.0  |
|              | 6  | 5.6               | 0.0  | 2.8  | 0.0  | 0.0  | 72.2 | 0.0  | 2.8  | 0.0  | 0.0   | 0.0  | 0.0  | 0.0  | 0.0  | 0.0  | 0.0  | 5.6  | 11.1 | 0.0  | 0.0  | 0.0  | 0.0  | 0.0  | 0.0  | 0.0 | 0.0  |
|              | 7  | 0.0               | 0.0  | 0.0  | 0.0  | 0.0  | 0.0  | 97.2 | 0.0  | 0.0  | 2.8   | 0.0  | 0.0  | 0.0  | 0.0  | 0.0  | 0.0  | 0.0  | 0.0  | 0.0  | 0.0  | 0.0  | 0.0  | 0.0  | 0.0  | 0.0 | 0.0  |
|              | 8  | 0.0               | 0.0  | 0.0  | 5.6  | 0.0  | 0.0  | 0.0  | 94.4 | 0.0  | 0.0   | 0.0  | 0.0  | 0.0  | 0.0  | 0.0  | 0.0  | 0.0  | 0.0  | 0.0  | 0.0  | 0.0  | 0.0  | 0.0  | 0.0  | 0.0 | 0.0  |
|              | 9  | 0.0               | 0.0  | 0.0  | 0.0  | 0.0  | 0.0  | 0.0  | 0.0  | 94.7 | 0.0   | 0.0  | 0.0  | 0.0  | 0.0  | 0.0  | 0.0  | 0.0  | 5.3  | 0.0  | 0.0  | 0.0  | 0.0  | 0.0  | 0.0  | 0.0 | 0.0  |
|              | 10 | 0.0               | 0.0  | 0.0  | 0.0  | 0.0  | 0.0  | 0.0  | 0.0  | 0.0  | 100.0 | 0.0  | 0.0  | 0.0  | 0.0  | 0.0  | 0.0  | 0.0  | 0.0  | 0.0  | 0.0  | 0.0  | 0.0  | 0.0  | 0.0  | 0.0 | 0.0  |
|              | 11 | 0.0               | 2.0  | 0.0  | 0.0  | 0.0  | 0.0  | 0.0  | 0.0  | 0.0  | 0.0   | 86.0 | 0.0  | 0.0  | 0.0  | 6.0  | 0.0  | 0.0  | 0.0  | 0.0  | 0.0  | 0.0  | 0.0  | 0.0  | 0.0  | 6.0 | 0.0  |
|              | 12 | 5.3               | 0.0  | 0.0  | 0.0  | 0.0  | 0.0  | 0.0  | 0.0  | 0.0  | 0.0   | 0.0  | 89.5 | 0.0  | 0.0  | 0.0  | 0.0  | 5.3  | 0.0  | 0.0  | 0.0  | 0.0  | 0.0  | 0.0  | 0.0  | 0.0 | 0.0  |
|              | 13 | 0.0               | 0.0  | 0.0  | 0.0  | 0.0  | 0.0  | 0.0  | 3.8  | 0.0  | 0.0   | 0.0  | 0.0  | 88.5 | 0.0  | 0.0  | 0.0  | 0.0  | 0.0  | 0.0  | 0.0  | 0.0  | 0.0  | 7.7  | 0.0  | 0.0 | 0.0  |
|              | 14 | 0.0               | 0.0  | 0.0  | 0.0  | 0.0  | 0.0  | 0.0  | 0.0  | 0.0  | 0.0   | 0.0  | 0.0  | 0.0  | 95.1 | 0.0  | 1.6  | 0.0  | 0.0  | 0.0  | 0.0  | 1.6  | 0.0  | 0.0  | 0.0  | 0.0 | 1.6  |
|              | 15 | 0.0               | 0.0  | 0.0  | 0.0  | 0.0  | 0.0  | 0.0  | 0.0  | 0.0  | 5.6   | 0.0  | 0.0  | 0.0  | 0.0  | 94.4 | 0.0  | 0.0  | 0.0  | 0.0  | 0.0  | 0.0  | 0.0  | 0.0  | 0.0  | 0.0 | 0.0  |
|              | 16 | 0.0               | 0.0  | 0.0  | 0.0  | 0.0  | 0.0  | 0.0  | 0.0  | 0.0  | 0.0   | 0.0  | 5.6  | 0.0  | 0.0  | 0.0  | 94.4 | 0.0  | 0.0  | 0.0  | 0.0  | 0.0  | 0.0  | 0.0  | 0.0  | 0.0 | 0.0  |
|              | 17 | 2.3               | 0.0  | 0.0  | 4.5  | 0.0  | 2.3  | 0.0  | 0.0  | 0.0  | 0.0   | 0.0  | 2.3  | 2.3  | 0.0  | 0.0  | 0.0  | 81.8 | 0.0  | 0.0  | 0.0  | 2.3  | 0.0  | 0.0  | 0.0  | 2.3 | 0.0  |
|              | 18 | 0.0               | 0.0  | 0.0  | 0.0  | 0.0  | 5.4  | 0.0  | 0.0  | 0.0  | 0.0   | 0.0  | 0.0  | 0.0  | 0.0  | 1.8  | 0.0  | 0.0  | 92.9 | 0.0  | 0.0  | 0.0  | 0.0  | 0.0  | 0.0  | 0.0 | 0.0  |
|              | 19 | 0.0               | 14.3 | 0.0  | 0.0  | 0.0  | 0.0  | 0.0  | 0.0  | 0.0  | 0.0   | 0.0  | 0.0  | 0.0  | 0.0  | 0.0  | 0.0  | 0.0  | 0.0  | 85.7 | 0.0  | 0.0  | 0.0  | 0.0  | 0.0  | 0.0 | 0.0  |
|              | 20 | 0.0               | 0.0  | 0.0  | 0.0  | 7.1  | 0.0  | 3.6  | 0.0  | 0.0  | 0.0   | 0.0  | 0.0  | 0.0  | 0.0  | 0.0  | 0.0  | 0.0  | 0.0  | 0.0  | 89.3 | 0.0  | 0.0  | 0.0  | 0.0  | 0.0 | 0.0  |
|              | 21 | 0.0               | 0.0  | 0.0  | 0.0  | 0.0  | 0.0  | 0.0  | 0.0  | 0.0  | 0.0   | 0.0  | 0.0  | 0.0  | 0.0  | 0.0  | 0.0  | 4.3  | 0.0  | 0.0  | 0.0  | 95.7 | 0.0  | 0.0  | 0.0  | 0.0 | 0.0  |
|              | 22 | 3.1               | 0.0  | 0.0  | 0.0  | 0.0  | 0.0  | 0.0  | 3.1  | 0.0  | 0.0   | 0.0  | 0.0  | 0.0  | 0.0  | 0.0  | 3.1  | 0.0  | 0.0  | 0.0  | 0.0  | 0.0  | 87.5 | 0.0  | 0.0  | 0.0 | 3.1  |
|              | 23 | 0.0               | 0.0  | 0.0  | 0.0  | 0.0  | 0.0  | 0.0  | 0.0  | 0.0  | 0.0   | 0.0  | 0.0  | 0.0  | 0.0  | 0.0  | 4.2  | 0.0  | 0.0  | 0.0  | 4.2  | 0.0  | 0.0  | 91.7 | 0.0  | 0.0 | 0.0  |
|              | 24 | 0.0               | 0.0  | 0.0  | 0.0  | 0.0  | 0.0  | 2.4  | 0.0  | 0.0  | 0.0   | 0.0  | 0.0  | 0.0  | 0.0  | 0.0  | 0.0  | 0.0  | 0.0  | 0.0  | 0.0  | 0.0  | 0.0  | 95.2 | 2.4  | 0.0 | 0.0  |
|              | 25 | 0.0               | 0.0  | 0.0  | 0.0  | 2.5  | 0.0  | 0.0  | 0.0  | 0.0  | 0.0   | 2.5  | 0.0  | 0.0  | 0.0  | 0.0  | 0.0  | 0.0  | 0.0  | 0.0  | 2.5  | 0.0  | 0.0  | 0.0  | 92.5 | 0.0 | 0.0  |
|              | 26 | 0.0               | 0.0  | 0.0  | 0.0  | 0.0  | 0.0  | 0.0  | 0.0  | 0.0  | 0.0   | 0.0  | 4.2  | 0.0  | 0.0  | 0.0  | 0.0  | 0.0  | 0.0  | 0.0  | 0.0  | 25.0 | 4.2  | 0.0  | 0.0  | 0.0 | 66.7 |
